# Supplementary material for: Multicomponent synthesis of pyrrolo[2,1-a]isoindolylidene-malononitrile (PIYM) fluorophores and their photophysical properties
Source: Royal Society of Chemistry journal article supplement (doi:10.1039/d2ob01209j), 2022-01-01
Supplement: d2ob01209j1.pdf [file d2ob01209j1.pdf]

**Electronic supporting information (ESI) for:**

**Multicomponent synthesis of pyrrolo[2,1-a]isoindolylidene-malononitrile  
(PIYM) fluorophores and their photophysical properties**

**Nithya Natarajan<sup>1</sup>, Ezhilan Jayabal<sup>2</sup>, Venkatesan Rengarajan<sup>2</sup> and Vasuki  
Gnanasambandam<sup>1\*</sup>**

1 Organic Research Laboratory, Department of Chemistry, Pondicherry University,  
R.V. Nagar, Kalapet, Puducherry 605014, India; [nithyapondicherry@gmail.com](mailto:nithyapondicherry@gmail.com) (N. Nithya);  
[vasukig@gmail.com](mailto:vasukig@gmail.com) (G. Vasuki)

2 Advanced Materials Research Laboratory, Department of Chemistry, Pondicherry  
University, R.V. Nagar, Kalapet, Puducherry 605014, India; [jezhilan90@gmail.com](mailto:jezhilan90@gmail.com) (J.  
Ezhilan); [venkatesanr.che@pondiuni.edu.in](mailto:venkatesanr.che@pondiuni.edu.in) (R. Venkatesan)

|                                                             |            |
|-------------------------------------------------------------|------------|
| <b>1. 2D NMR characterization of PIYM fluorophore 5I</b>    | <b>S2</b>  |
| <b>2. Photophysical and electrochemical data</b>            | <b>S4</b>  |
| <b>3. Single crystal X-ray diffraction</b>                  | <b>S9</b>  |
| <b>4. Cartesian coordinates for the optimized structure</b> | <b>S11</b> |
| <b>5. Lifetime data</b>                                     | <b>S14</b> |
| <b>6. <sup>1</sup>H and <sup>13</sup>C NMR spectra</b>      | <b>S15</b> |
| <b>7. References</b>                                        | <b>S38</b> |

# 1. 2D NMR characterization of PIYM fluorophore 5l

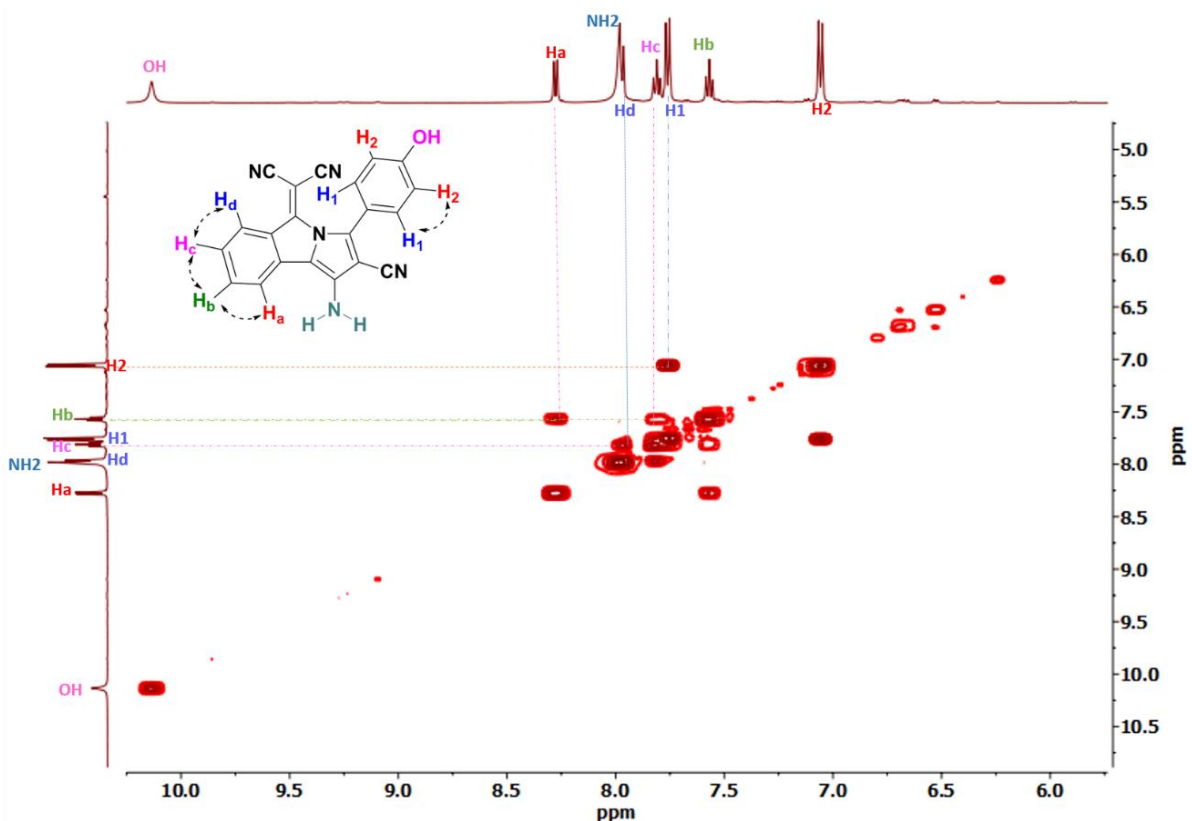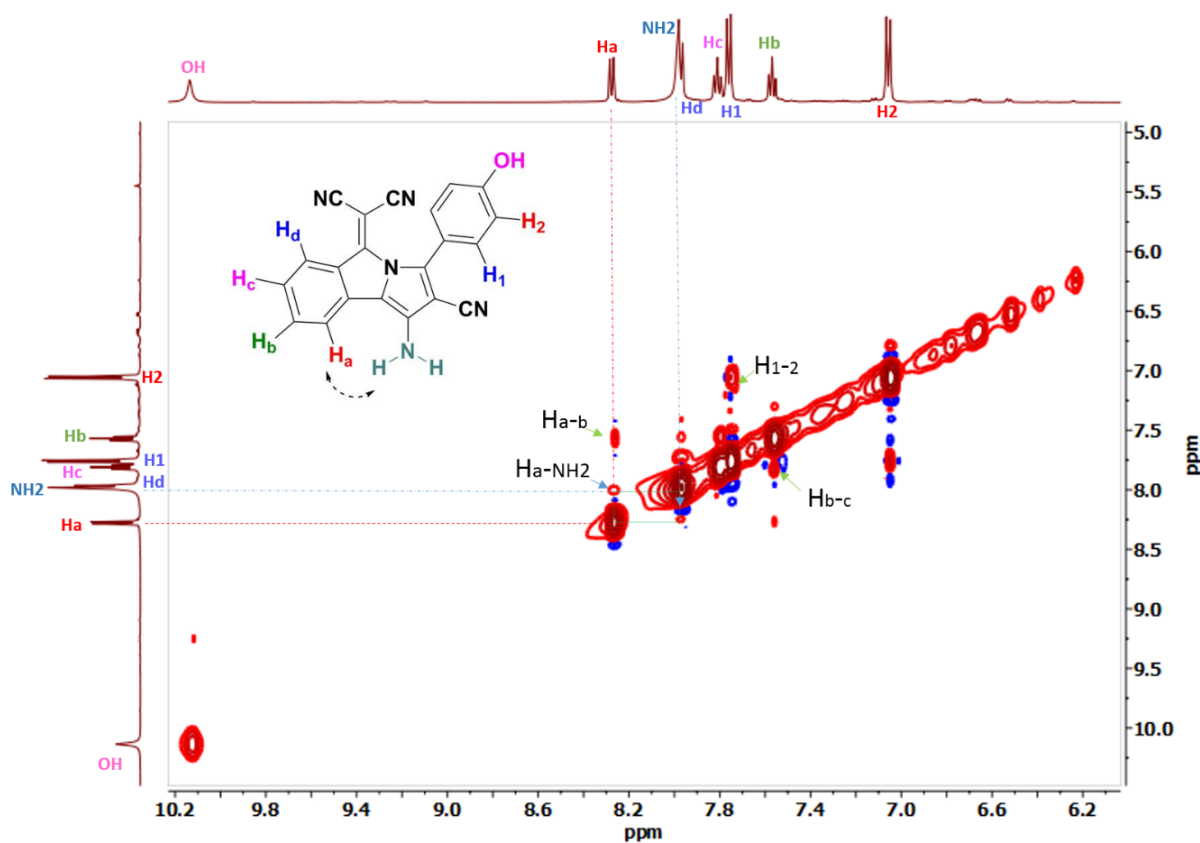

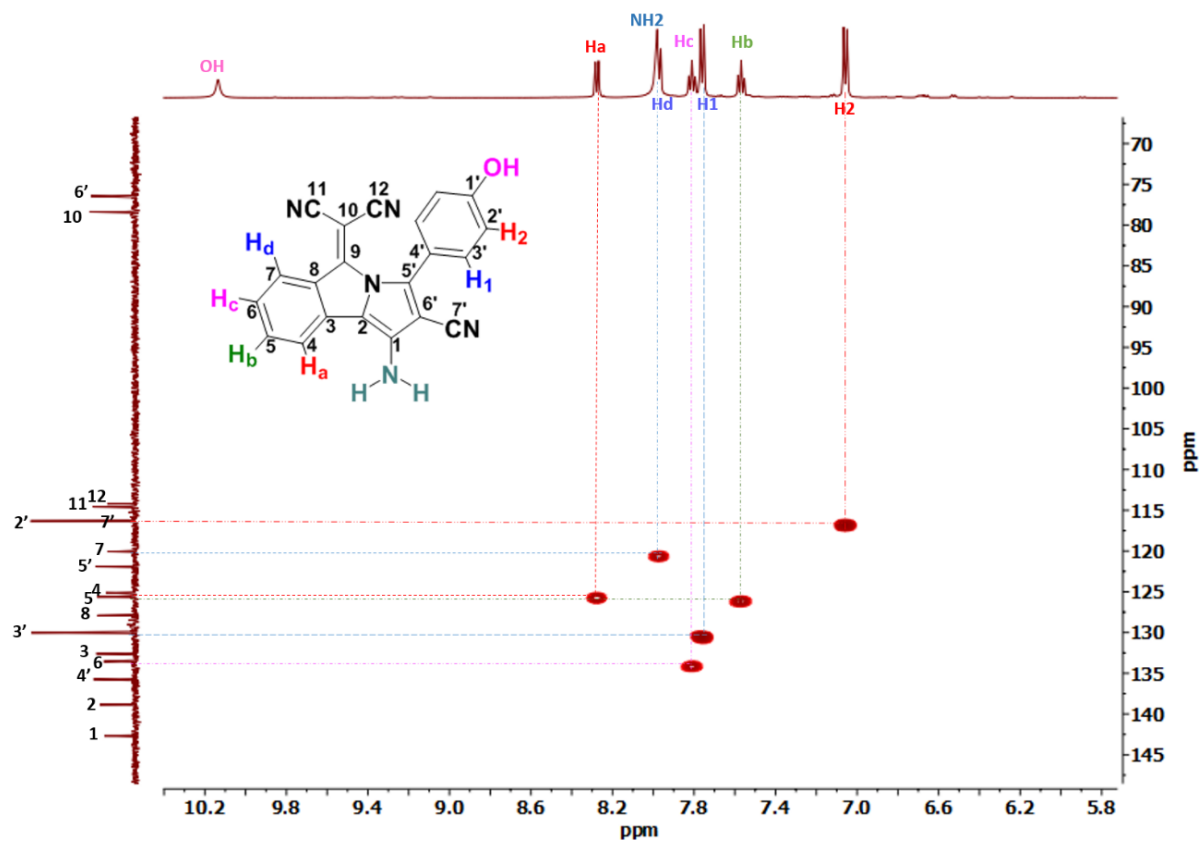

Fig. S3 HSQC (C-H) spectra of 5l in DMSO- $d_6$

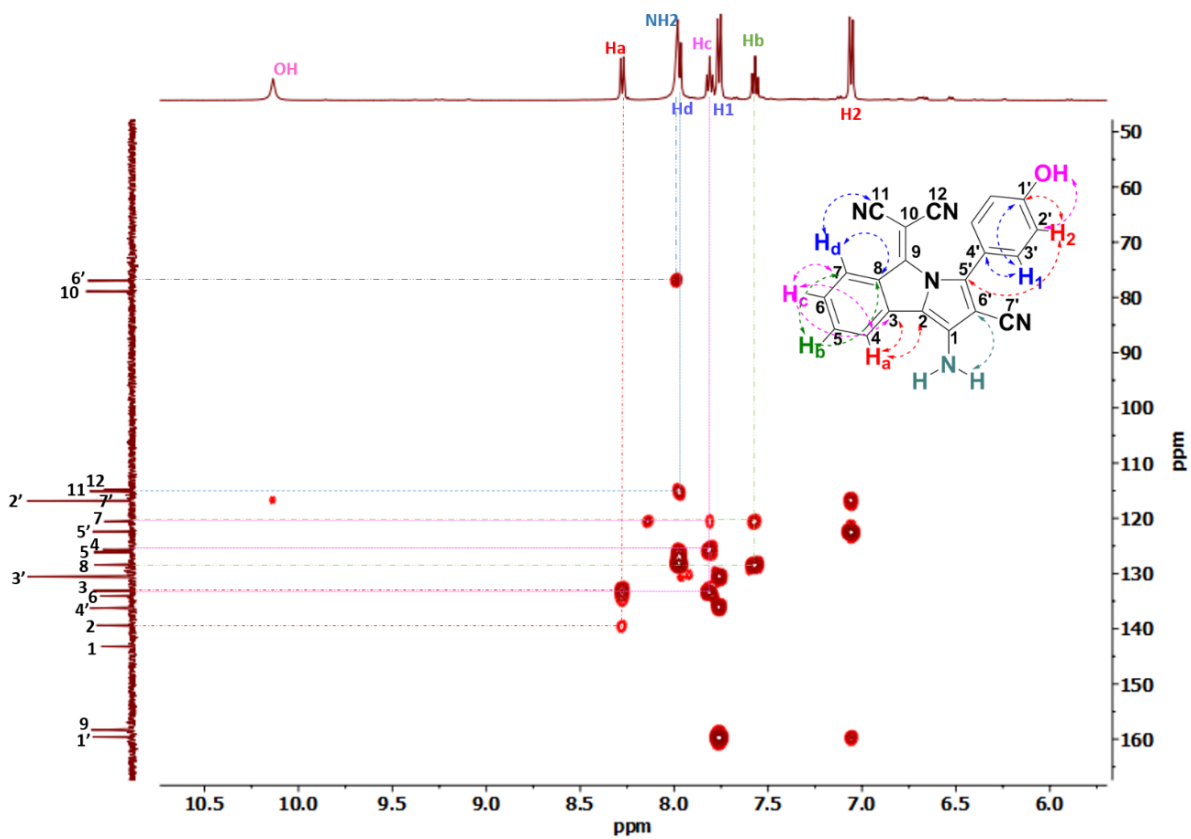

Fig. S4 HMBC (C-H) spectra of 5l in DMSO- $d_6$

## 2. Photophysical and electrochemical data

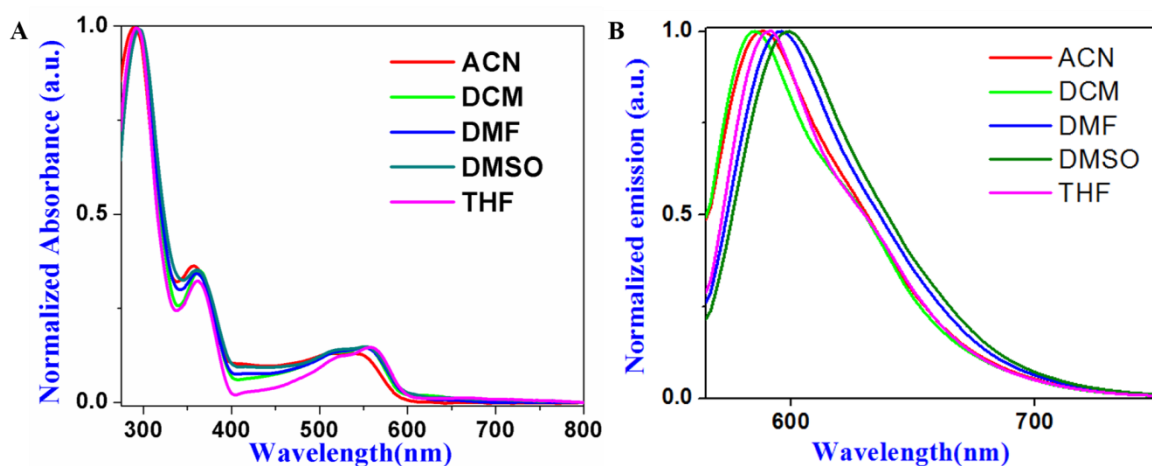

**Fig. S5** UV-vis (A) and emission spectra (B) of **5a** measured in different solvents at 2.5  $\mu\text{M}$ .

**Table S1** UV-vis and emission data of **5a** measured in different solvents at 2.5  $\mu\text{M}$ .

| Compound  | Solvent | $\lambda_{\text{abs}}^{\text{a,b}}$<br>(nm) | $\lambda_{\text{em}}$<br>(nm) |
|-----------|---------|---------------------------------------------|-------------------------------|
| <b>5a</b> | DCM     | 367, 555                                    | 585                           |
|           | ACN     | 364, 551                                    | 589                           |
|           | THF     | 370, 561                                    | 592                           |
|           | DMF     | 368, 555                                    | 596                           |
|           | DMSO    | 370, 561                                    | 599                           |

<sup>a,b</sup>Absorption maxima of the corresponding two absorption bands.

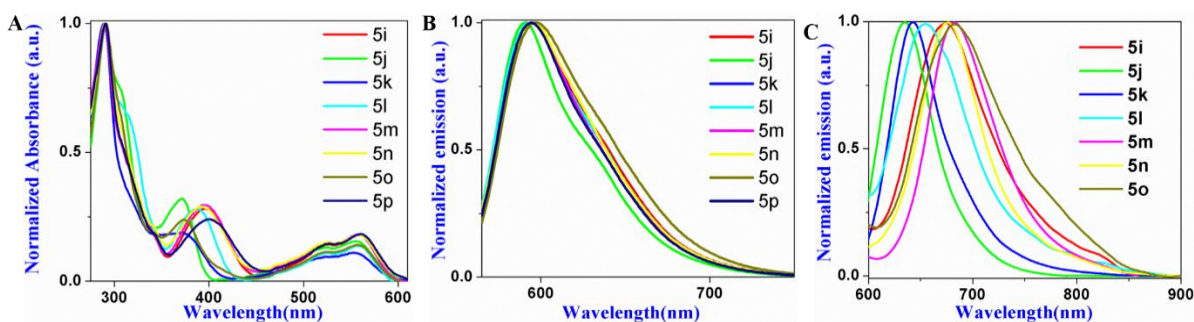

**Fig. S6** UV-vis (A), emission spectra in DMF (B), and solid-state emission spectra (C) of compounds **5i–p**.

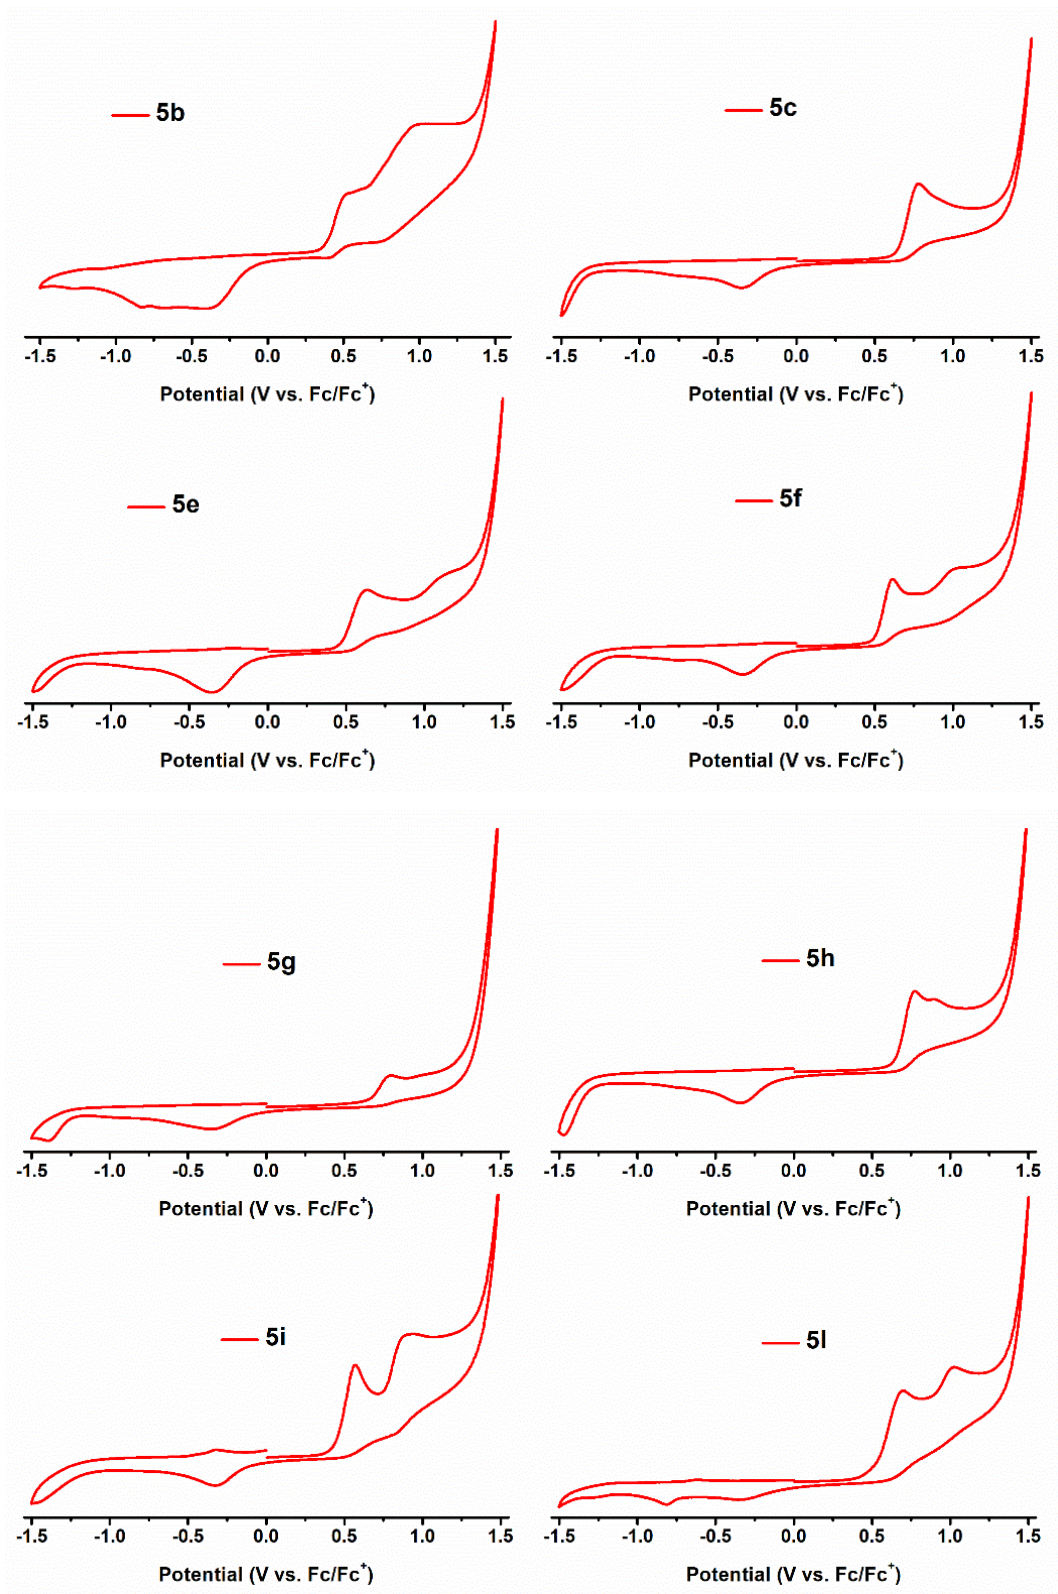

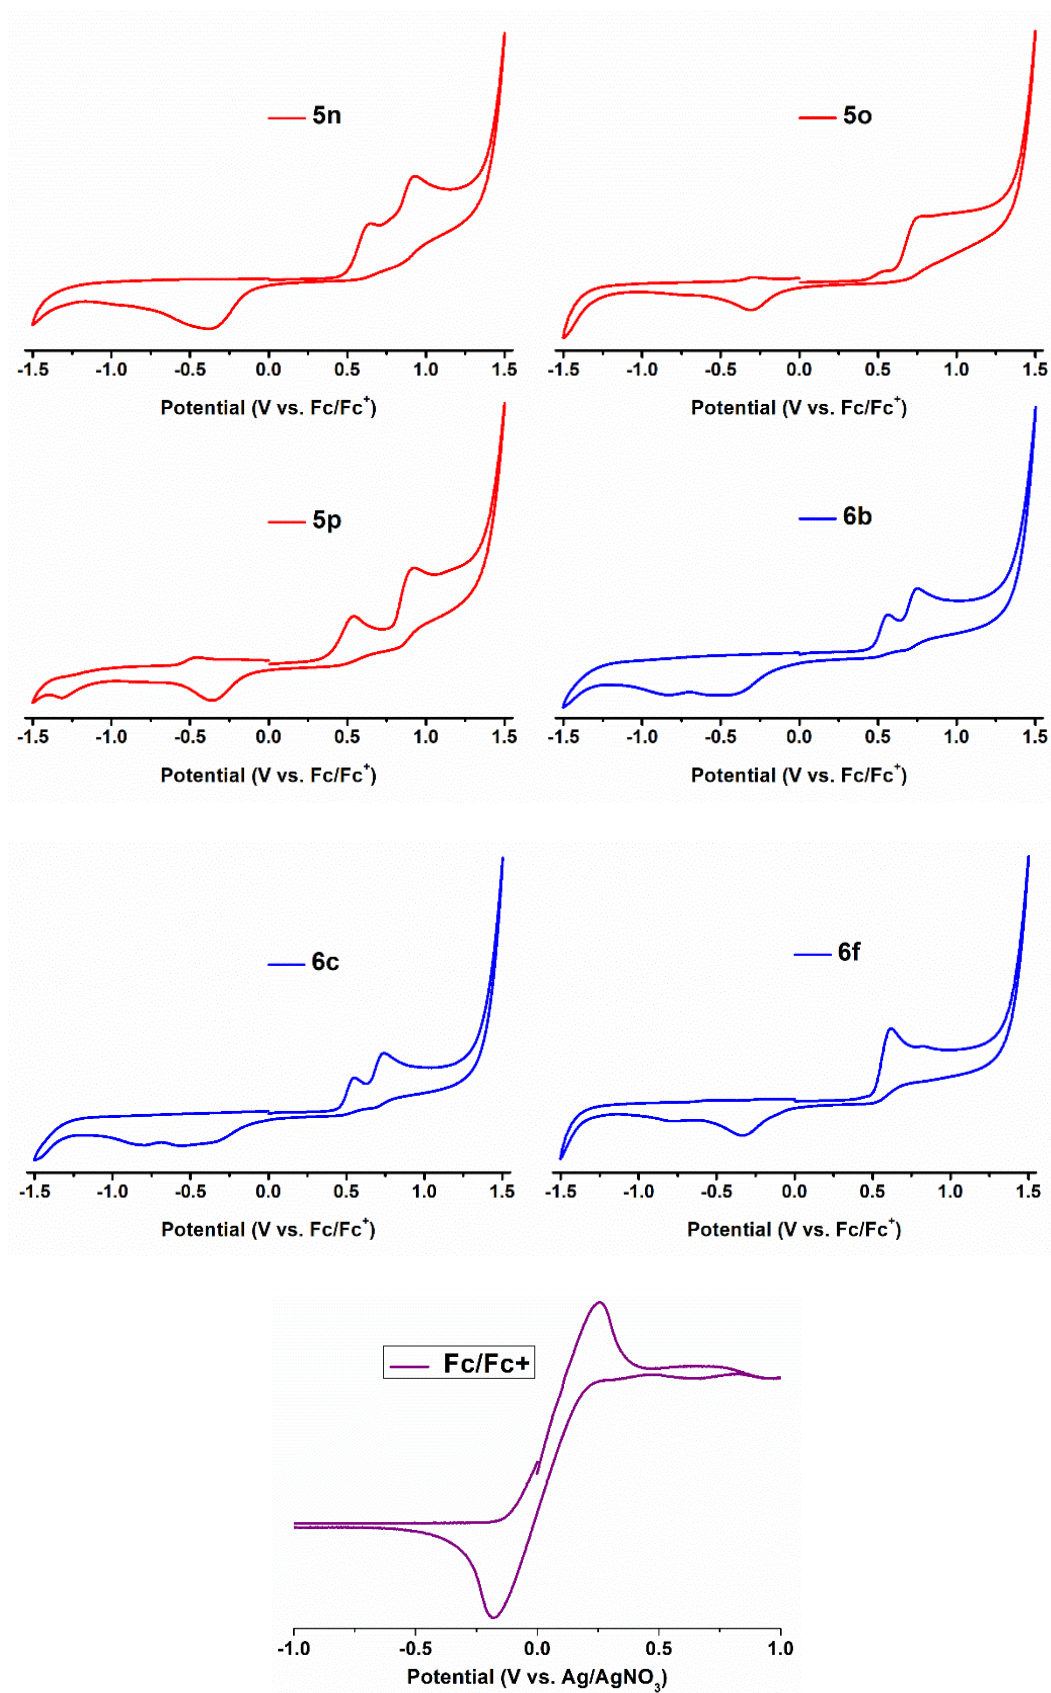

**Fig. S7** Cyclic voltammograms of selected PIYM fluorophores and ferrocene reference.

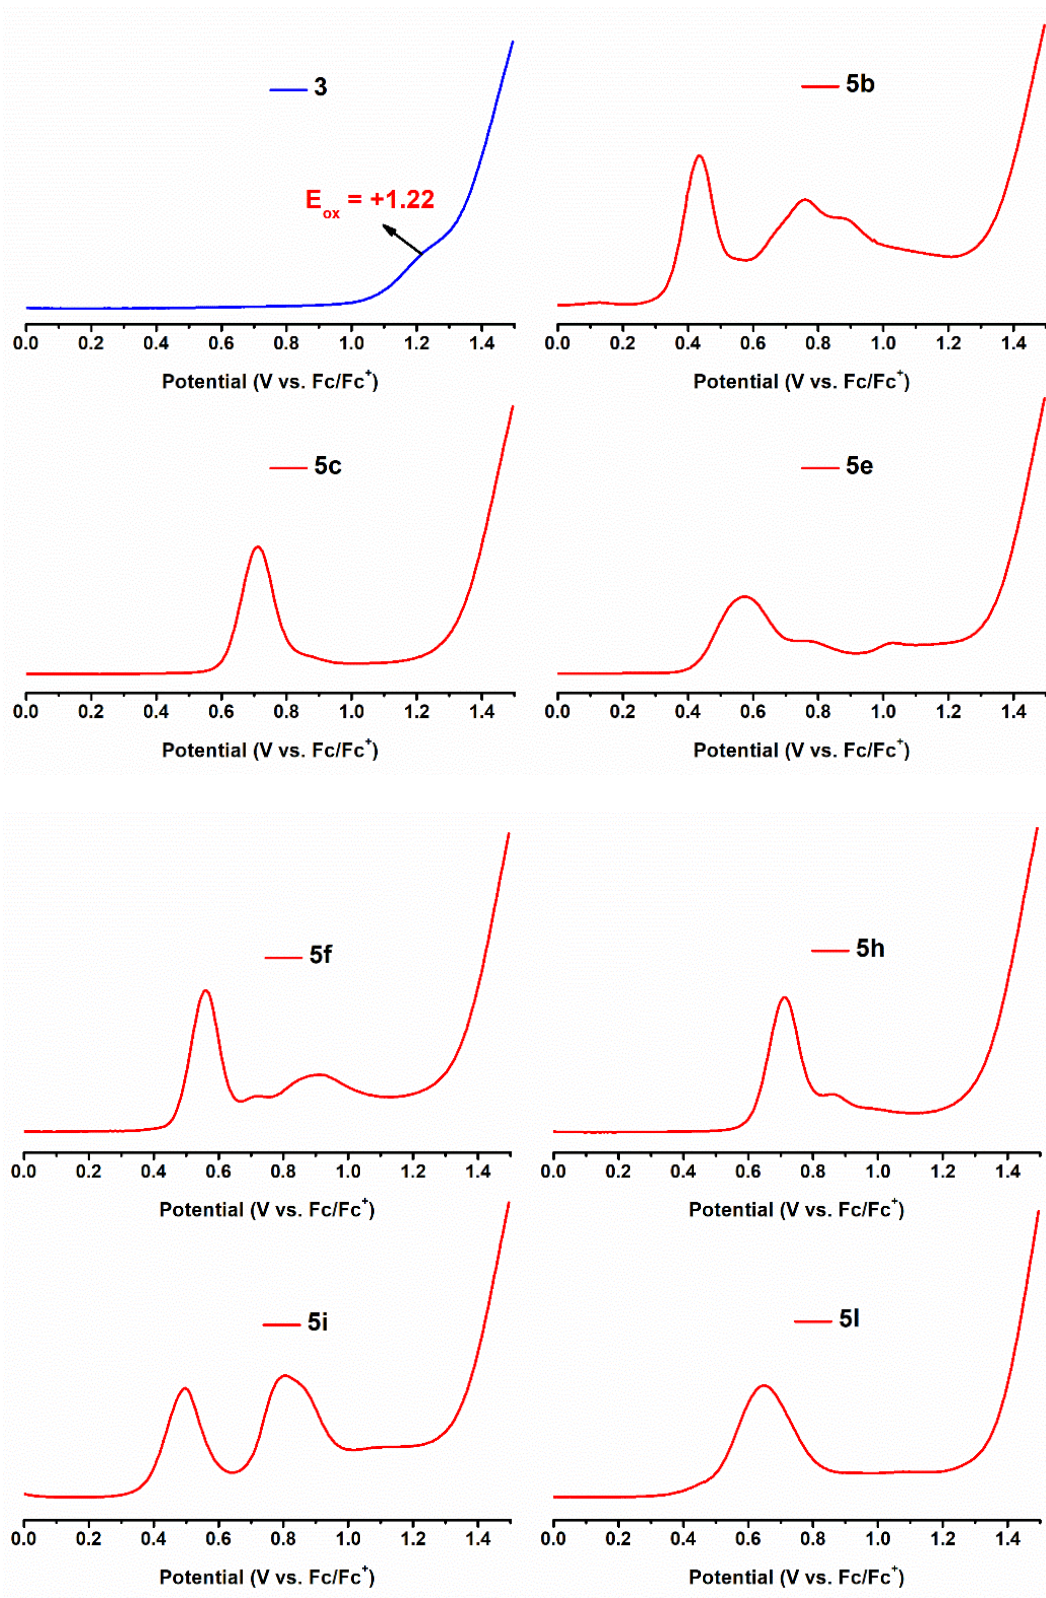

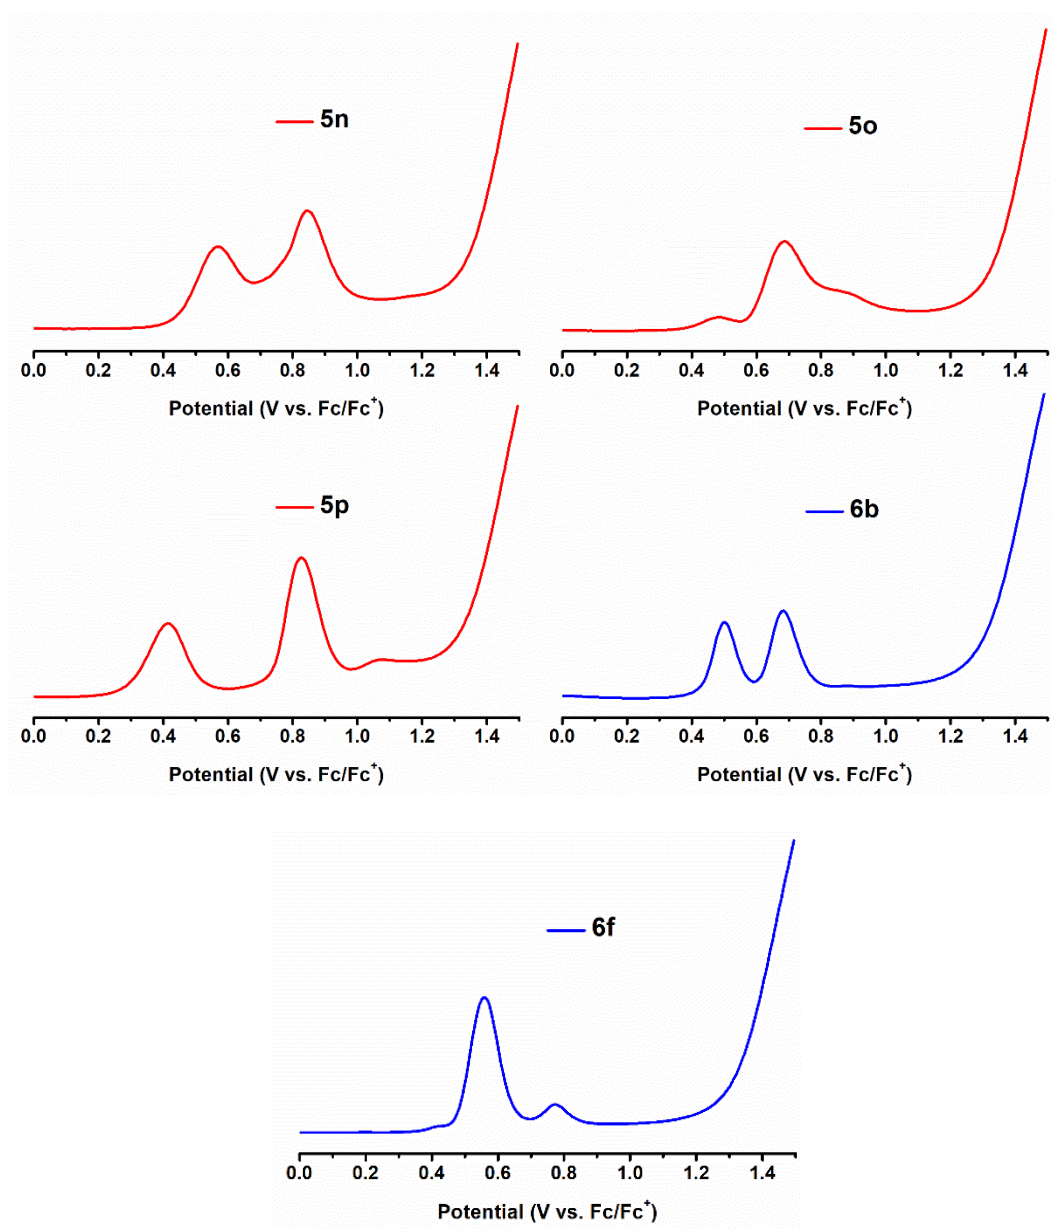

**Fig. S8** Differential pulse voltammograms of selected PIYM fluorophores.

**Table S2** Photophysical and electrochemical properties of rest of the PIYM fluorophores

| S.No. | Compd | $\lambda_{\text{abs}}^{\text{a,b}}$<br>(nm) | $\lambda_{\text{em}}$<br>(nm) | $\lambda_{\text{em}}(\text{solid})$<br>(nm) | $E_{\text{ox}}$<br>(eV) | $E_{\text{HOMO}}$<br>(eV) | $E_{\text{LUMO}}$<br>(eV) | $E_{\text{g}}(\text{opt})$<br>(eV) |
|-------|-------|---------------------------------------------|-------------------------------|---------------------------------------------|-------------------------|---------------------------|---------------------------|------------------------------------|
| 1     | 5i    | 392, 558                                    | 595                           | 676                                         | 0.57                    | -5.01                     | -2.92                     | 2.09                               |
| 2     | 5j    | 373, 555                                    | 592                           | 645                                         | -                       | -                         | -                         | 2.09                               |
| 3     | 5k    | 372, 554                                    | 594                           | 641                                         | -                       | -                         | -                         | 2.09                               |
| 4     | 5l    | 387, 558                                    | 597                           | 652                                         | 0.70                    | -5.14                     | -3.05                     | 2.09                               |



|    |    |          |     |     |      |       |       |      |
|----|----|----------|-----|-----|------|-------|-------|------|
| 5  | 5m | 397, 560 | 595 | 682 | -    | -     | -     | 2.08 |
| 6  | 5n | 400, 561 | 595 | 677 | 0.64 | -5.08 | -3.01 | 2.07 |
| 7  | 5o | 387, 558 | 597 | 681 | 0.76 | -5.20 | -3.12 | 2.08 |
| 8  | 5p | 397, 558 | 595 | -   | 0.55 | -4.99 | -2.93 | 2.06 |
| 9  | 6c | 383, 560 | 605 | 657 | 0.54 | -4.98 | -2.97 | 2.01 |
| 10 | 6d | 376, 581 | 618 | 649 | -    | -     | -     | 2.00 |
| 11 | 6e | 370, 577 | 617 | 672 | -    | -     | -     | 2.01 |
| 12 | 6f | 370, 570 | 629 | 684 | 0.62 | -5.06 | -3.11 | 1.95 |
| 13 | 6g | 375, 578 | 615 | 643 | -    | -     | -     | 2.01 |

<sup>a,b</sup>Absorption maxima of the corresponding two absorption bands.

### 3. Single crystal X-ray diffraction

Single crystals of compound **3** was obtained by crystallization of dimethylformamide solution. Data collection was performed with a **Xcalibur, Eos** diffractometer. The crystal was kept at 298 K during data collection. Using Olex2, the structure was solved with the ShelXS structure solution program using Direct Methods and refined with the ShelXL [1–3] refinement package using Least Squares minimization. Details for data collection and structure refinement are summarized in **Table S1**. CCDC-1969167 (for **3**), contain supplementary crystallographic data for this paper. These data can be obtained free of charge from The Cambridge Crystallographic Data Centre *via* [www.ccdc.cam.ac.uk/data\\_request/cif](http://www.ccdc.cam.ac.uk/data_request/cif).

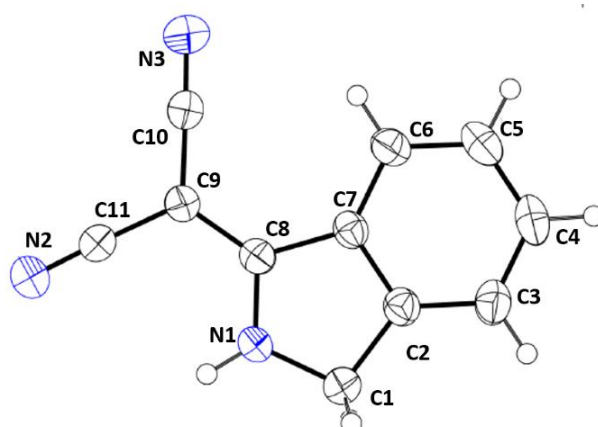

**Fig. S9** Molecular structure of compound **3** presented using thermal ellipsoids of the 50% probability.

**Table S3** Crystal data and structure refinement for compound **3**.

|                                             | <b>Compound 3</b>                                             |
|---------------------------------------------|---------------------------------------------------------------|
| Empirical formula                           | C <sub>11</sub> H <sub>7</sub> N <sub>3</sub>                 |
| Formula weight                              | 181.20                                                        |
| Temperature/K                               | 298(2)                                                        |
| Crystal system                              | monoclinic                                                    |
| Space group                                 | P2 <sub>1</sub> /c                                            |
| a/Å                                         | 3.9218(3)                                                     |
| b/Å                                         | 15.5165(11)                                                   |
| c/Å                                         | 14.5798(11)                                                   |
| α/°                                         | 90                                                            |
| β/°                                         | 95.477(7)                                                     |
| γ/°                                         | 90                                                            |
| Volume/Å <sup>3</sup>                       | 883.18(11)                                                    |
| Z                                           | 4                                                             |
| ρ <sub>calc</sub> /g/cm <sup>3</sup>        | 1.363                                                         |
| μ/mm <sup>-1</sup>                          | 0.086                                                         |
| F(000)                                      | 376.0                                                         |
| Crystal size/mm <sup>3</sup>                | 0.72 × 0.4 × 0.2                                              |
| Radiation                                   | Mo Kα (λ = 0.71073)                                           |
| 2θ range for data collection/°              | 6.198 to 58.422                                               |
| Index ranges                                | -5 ≤ h ≤ 5, -20 ≤ k ≤ 19, -18 ≤ l ≤ 19                        |
| Reflections collected                       | 9532                                                          |
| Independent reflections                     | 2161 [R <sub>int</sub> = 0.0280, R <sub>sigma</sub> = 0.0215] |
| Data/restraints/parameters                  | 2161/0/127                                                    |
| Goodness-of-fit on F <sup>2</sup>           | 1.257                                                         |
| Final R indexes [I ≥ 2σ (I)]                | R <sub>1</sub> = 0.0744, wR <sub>2</sub> = 0.2012             |
| Final R indexes [all data]                  | R <sub>1</sub> = 0.0845, wR <sub>2</sub> = 0.2065             |
| Largest diff. peak/hole / e Å <sup>-3</sup> | 0.29/-0.30                                                    |

#### 4. Cartesian coordinates for the optimized structure

5a

E = -1080.52718319 a.u., Number of negative frequencies = 0

0 1

|   |             |             |             |
|---|-------------|-------------|-------------|
| C | -4.80857000 | -0.57895200 | 0.44147400  |
| C | -4.88337600 | 0.81847000  | 0.36777900  |
| C | -3.73730000 | 1.59164700  | 0.18371600  |
| C | -2.50328400 | 0.94533300  | 0.08096700  |
| C | -2.42438400 | -0.47583600 | 0.14085300  |
| C | -3.58454000 | -1.23774800 | 0.32069900  |
| C | -1.16597100 | 1.44003200  | -0.07635200 |
| N | -0.29486500 | 0.32931200  | -0.07787800 |
| C | -1.02461600 | -0.86814700 | -0.09250000 |
| C | -0.40629200 | 2.58499300  | -0.18522800 |
| C | 0.97692100  | 2.14871200  | -0.20592800 |
| C | 1.03041000  | 0.75924800  | -0.09880300 |
| C | -0.54611700 | -2.11866900 | -0.44736500 |
| C | 0.70155500  | -2.36242100 | -1.09108300 |
| N | 1.66686400  | -2.62368900 | -1.68854600 |
| C | -1.37063500 | -3.27657200 | -0.32313000 |
| N | -2.01626800 | -4.24046600 | -0.21488500 |
| C | 2.06467300  | 3.05431300  | -0.18601200 |
| N | 2.89656200  | 3.87086400  | -0.17455900 |
| H | -5.71300800 | -1.16045200 | 0.59008200  |
| H | -5.84887000 | 1.30897100  | 0.45483100  |
| H | -3.81181600 | 2.67331600  | 0.11944700  |
| H | -3.54751000 | -2.31818700 | 0.37408500  |
| C | 2.21633700  | -0.05142800 | 0.19460100  |

|   |             |             |             |
|---|-------------|-------------|-------------|
| C | 2.20975800  | -0.95633400 | 1.27132100  |
| C | 3.40201000  | 0.14219900  | -0.53195900 |
| C | 3.36469500  | -1.65796300 | 1.60446100  |
| H | 1.30484900  | -1.09493100 | 1.85605400  |
| C | 4.55354000  | -0.56546300 | -0.19447500 |
| H | 3.41365700  | 0.82994600  | -1.37127100 |
| C | 4.53852600  | -1.46652300 | 0.87147900  |
| H | 3.34963100  | -2.35155700 | 2.44029800  |
| H | 5.46190300  | -0.41617500 | -0.77056700 |
| H | 5.43747000  | -2.01860100 | 1.13038400  |
| N | -0.80454400 | 3.89377100  | -0.28328700 |
| H | -0.08991500 | 4.58980900  | -0.10885600 |
| H | -1.71067100 | 4.13597200  | 0.09252000  |

**6a**

E = -1156.99138138 a.u., Number of negative frequencies = 0

0 1

|   |             |             |             |
|---|-------------|-------------|-------------|
| C | -4.97906000 | -0.24864900 | 0.38342700  |
| C | -4.91754400 | 1.15125900  | 0.32153000  |
| C | -3.70261500 | 1.81081700  | 0.14744300  |
| C | -2.53561500 | 1.04800200  | 0.03866000  |
| C | -2.59223800 | -0.37490500 | 0.10301700  |
| C | -3.82388400 | -1.02123700 | 0.27073200  |
| C | -1.16116600 | 1.41098900  | -0.11771000 |
| N | -0.39890600 | 0.22811500  | -0.11588300 |
| C | -1.23293700 | -0.89845000 | -0.10296700 |
| C | -0.29666500 | 2.48639000  | -0.17040700 |
| C | 1.05456800  | 1.93631400  | -0.12642000 |
| C | 0.96300700  | 0.54781100  | -0.07316200 |
| C | -0.87365700 | -2.20990300 | -0.38799200 |

|   |             |             |             |
|---|-------------|-------------|-------------|
| C | 0.33052200  | -2.61953200 | -1.02780700 |
| N | 1.24409700  | -3.03236100 | -1.62227700 |
| C | -1.79958500 | -3.27735100 | -0.19247000 |
| N | -2.52451800 | -4.17483300 | -0.02586900 |
| H | -5.93652400 | -0.74082200 | 0.52304900  |
| H | -5.83127200 | 1.73211600  | 0.41349400  |
| H | -3.66693000 | 2.89562700  | 0.11240000  |
| H | -3.89242900 | -2.09988700 | 0.32534800  |
| C | 2.03279400  | -0.44112800 | 0.16965000  |
| C | 3.09913600  | -0.59309600 | -0.73201800 |
| C | 2.02041200  | -1.20587000 | 1.34894400  |
| C | 4.13123300  | -1.48936100 | -0.45686800 |
| H | 3.10216500  | -0.02298500 | -1.65595800 |
| C | 3.05169300  | -2.10498500 | 1.61601500  |
| H | 1.20571800  | -1.08656700 | 2.05757800  |
| C | 4.10965600  | -2.24703600 | 0.71567800  |
| H | 4.94276000  | -1.60839200 | -1.16879200 |
| H | 3.03057600  | -2.69048200 | 2.53072700  |
| H | 4.91080500  | -2.95037100 | 0.92387100  |
| N | -0.59186400 | 3.81549900  | -0.17301400 |
| H | 0.20135500  | 4.41542500  | -0.38508400 |
| H | -1.50511100 | 4.10618800  | -0.48908400 |
| C | 2.23047000  | 2.84409800  | -0.06700100 |
| O | 2.10810500  | 4.04366300  | -0.34982800 |
| N | 3.43075000  | 2.35103200  | 0.33765600  |
| H | 4.21153100  | 2.99194000  | 0.33009900  |
| H | 3.59447100  | 1.37168800  | 0.51506100  |

## 6. Lifetime data

**Table S4** CHISQ values of the data obtained for lifetime fitting.

| <b>S.No.</b> | <b>Compd</b> | <b>CHISQ value</b> | <b>Degrees of freedom</b> |
|--------------|--------------|--------------------|---------------------------|
| 1            | 5a           | 1.034984/1.504469* | 981/869*                  |
| 2            | 5b           | 1.173358           | 885                       |
| 3            | 5c           | 1.130323           | 981                       |
| 4            | 5d           | 1.123169           | 981                       |
| 5            | 5e           | 1.194393           | 981                       |
| 6            | 5f           | 1.24269            | 981                       |
| 7            | 5g           | 1.169749           | 981                       |
| 8            | 5h           | 1.267221           | 981                       |
| 9            | 6a           | 1.696128           | 1000                      |
| 10           | 6b           | 1.469595           | 1000                      |

\*Obtained in solid-state.

## 7. $^1\text{H}$ and $^{13}\text{C}$ NMR spectra

$^1\text{H}$  NMR (400 MHz,  $\text{DMSO-}d_6$ ) spectra of **3**

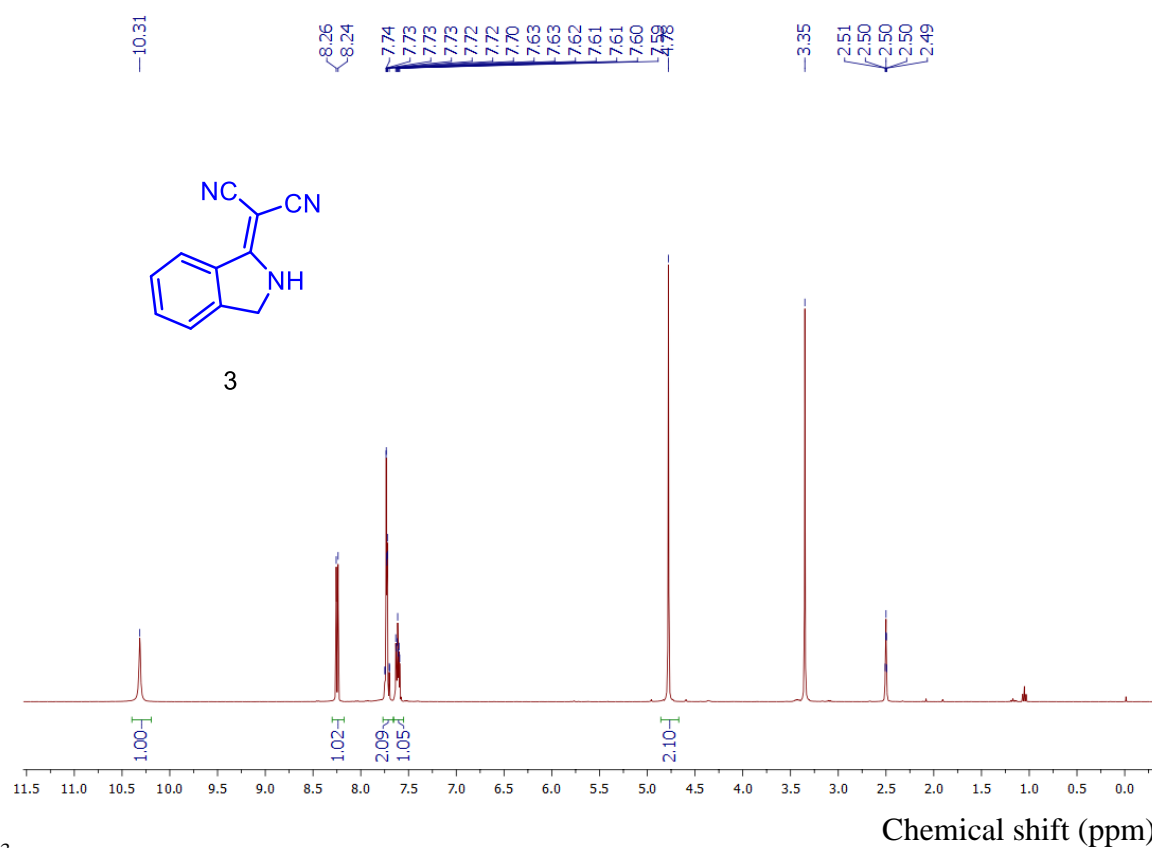

$^{13}\text{C}$  NMR (400 MHz,  $\text{DMSO-}d_6$ ) spectra of **3**

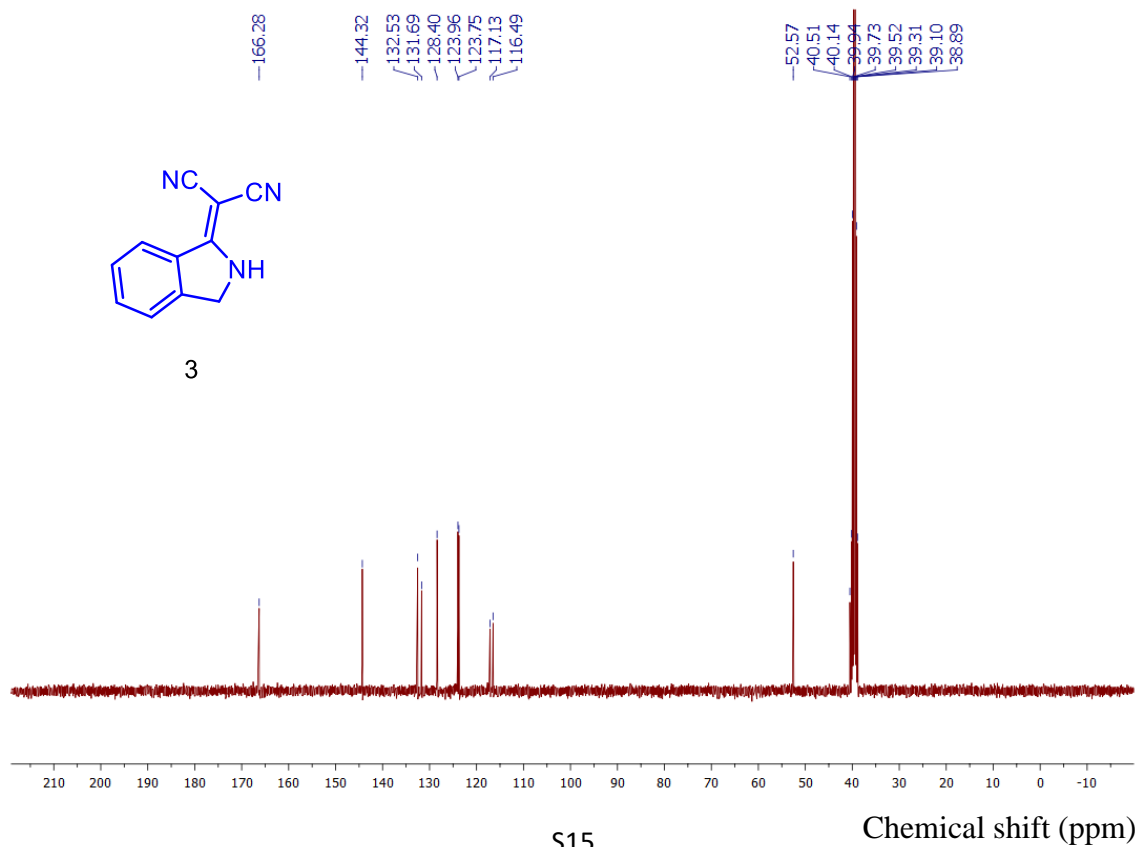

<sup>1</sup>H NMR Spectra of **5a** (400 MHz, DMSO-*d*<sub>6</sub>)

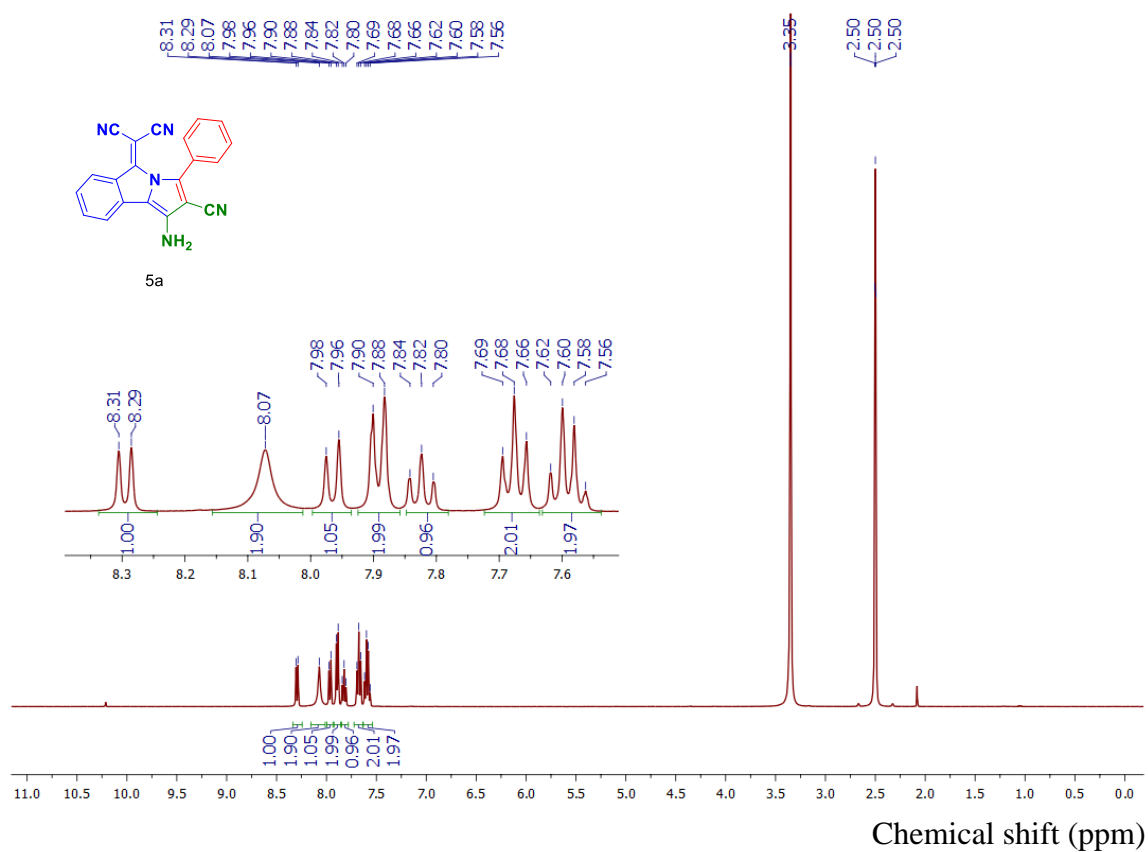

<sup>13</sup>C NMR Spectra of **5a** (400 MHz, DMSO-*d*<sub>6</sub>)

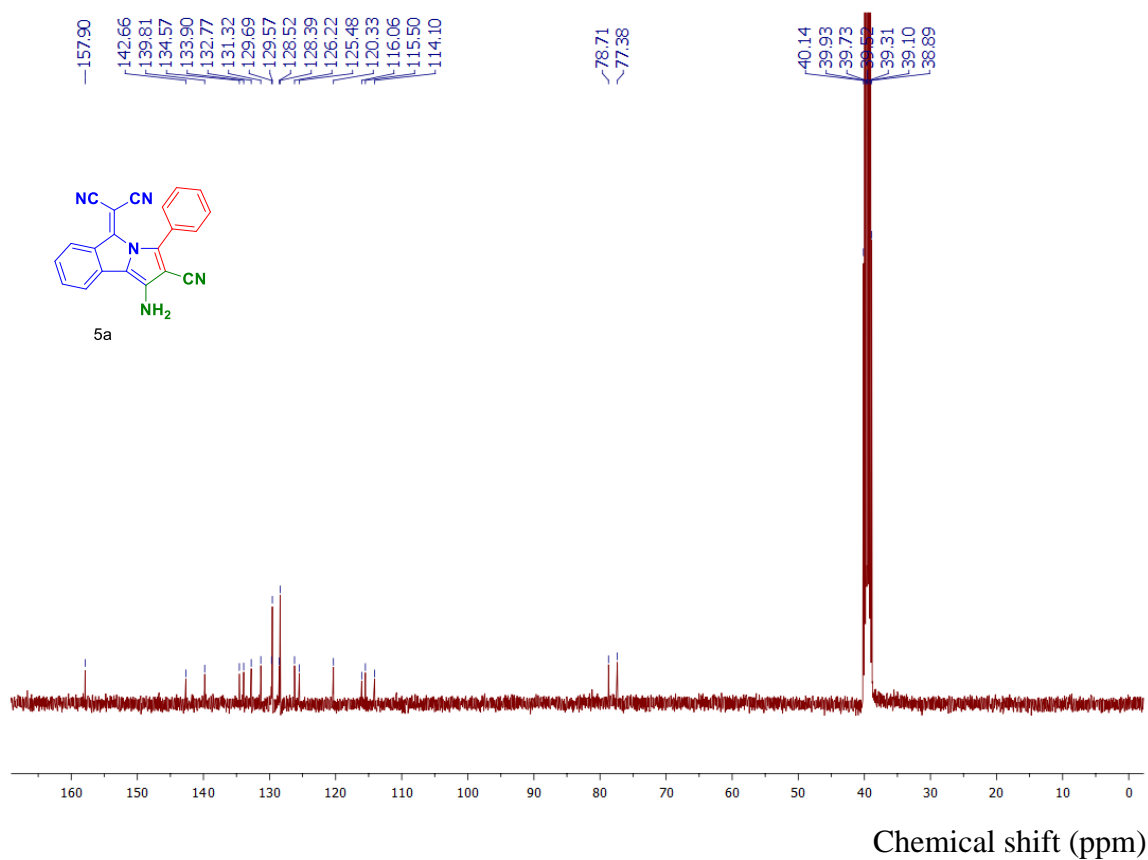



<sup>1</sup>H NMR Spectra of **5b** (400 MHz, DMSO-*d*<sub>6</sub>)

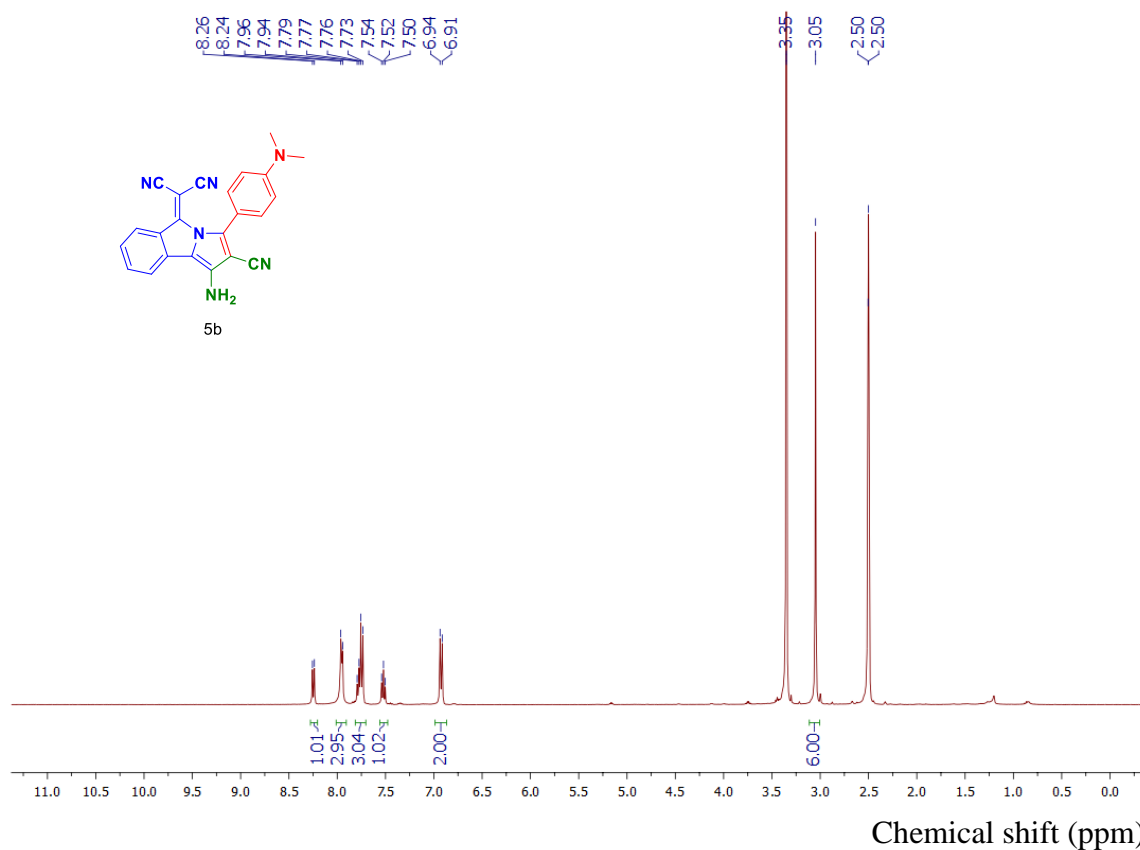

<sup>13</sup>C NMR Spectra of **5b** (400 MHz, DMSO-*d*<sub>6</sub>)

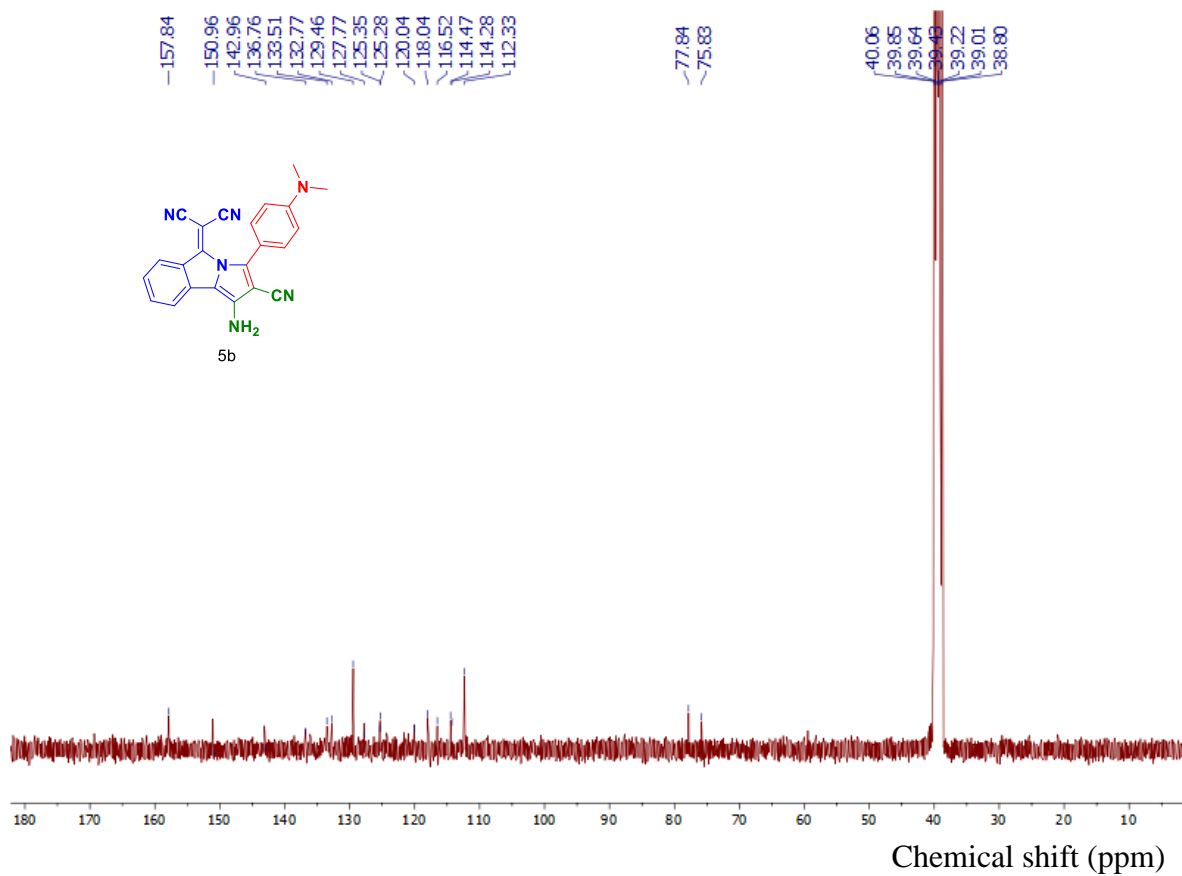

<sup>1</sup>H NMR Spectra of **5c** (400 MHz, DMSO-*d*<sub>6</sub>)

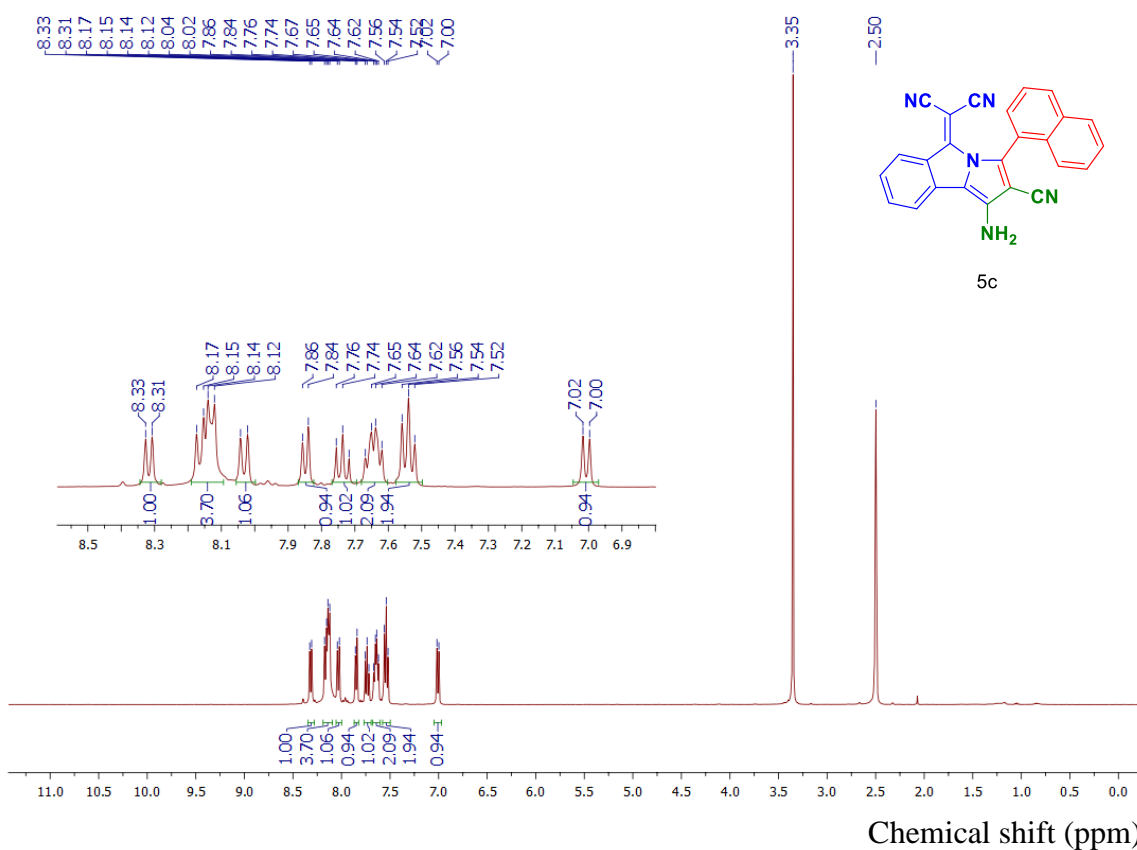

<sup>13</sup>C NMR Spectra of **5c** (400 MHz, DMSO-*d*<sub>6</sub>)

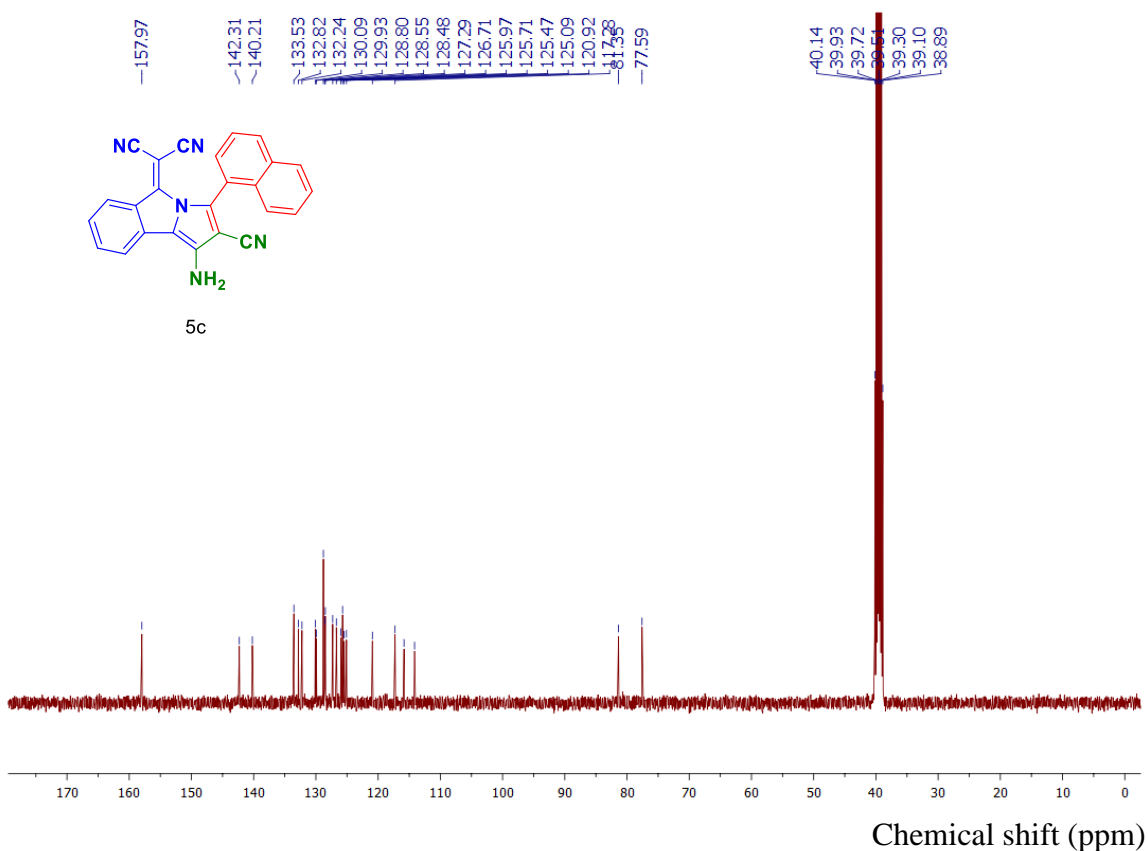

<sup>1</sup>H NMR Spectra of **5d** (400 MHz, DMSO-*d*<sub>6</sub>)

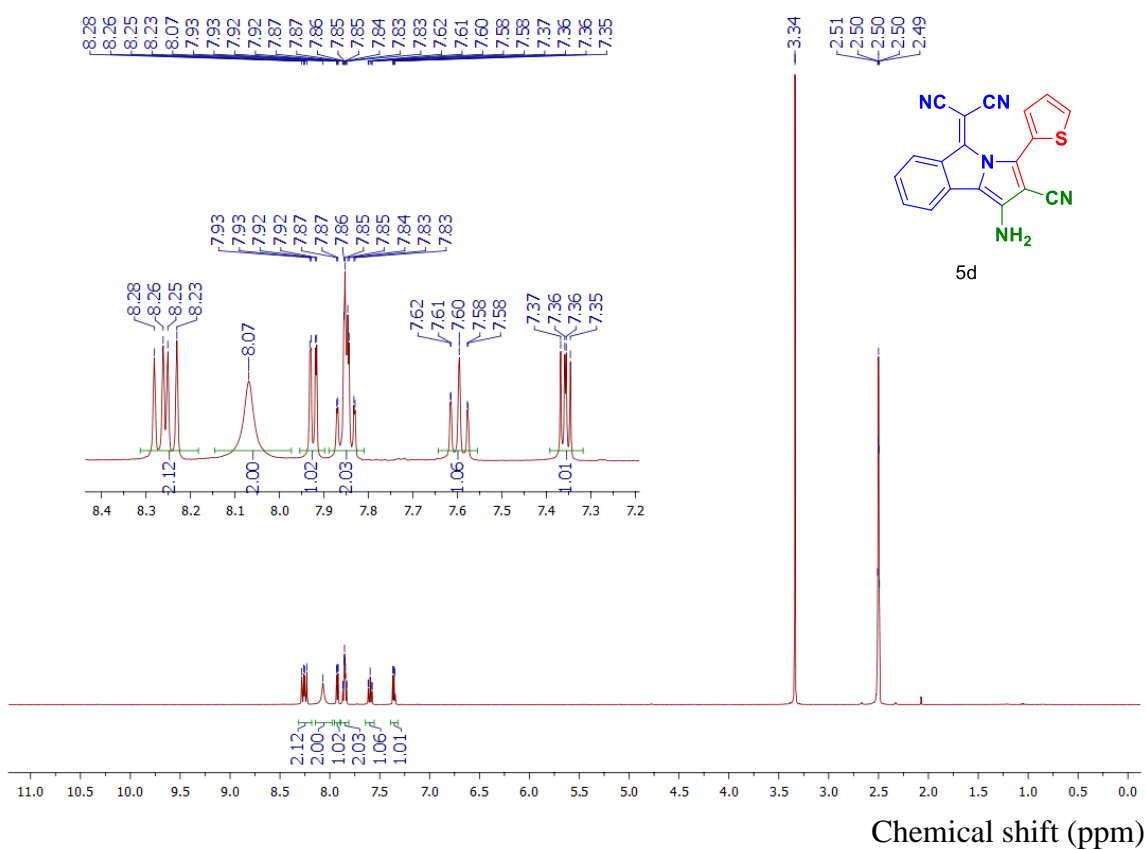

<sup>13</sup>C NMR Spectra of **5d** (400 MHz, DMSO-*d*<sub>6</sub>)

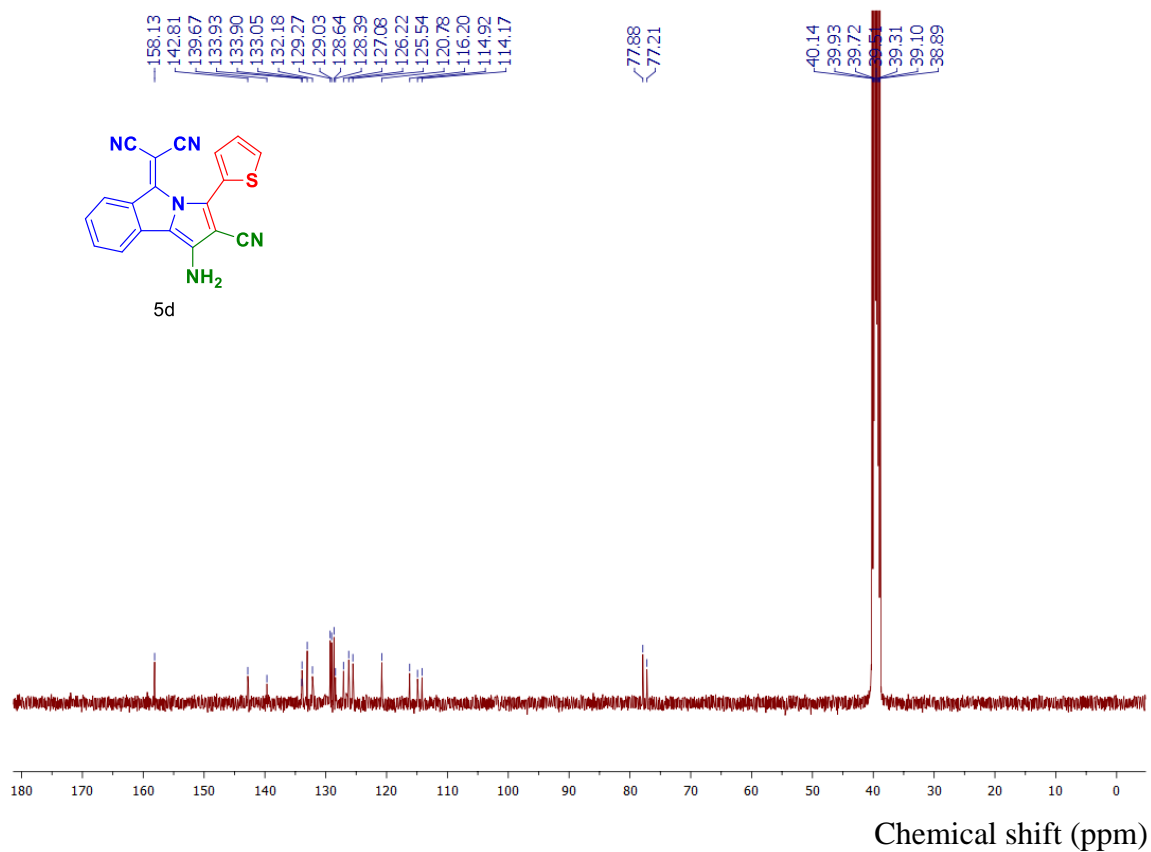

<sup>1</sup>H NMR Spectra of **5e** (400 MHz, DMSO-*d*<sub>6</sub>)

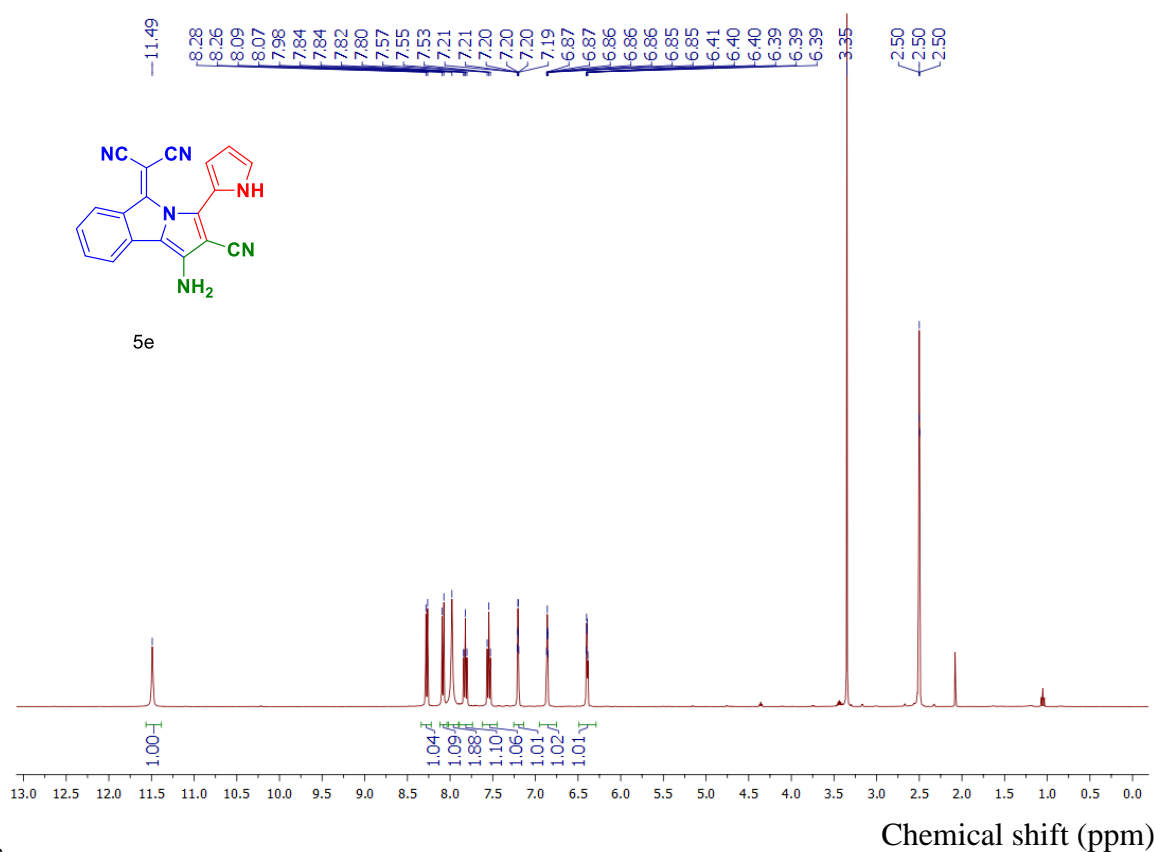

<sup>13</sup>C NMR Spectra of **5e** (400 MHz, DMSO-*d*<sub>6</sub>)

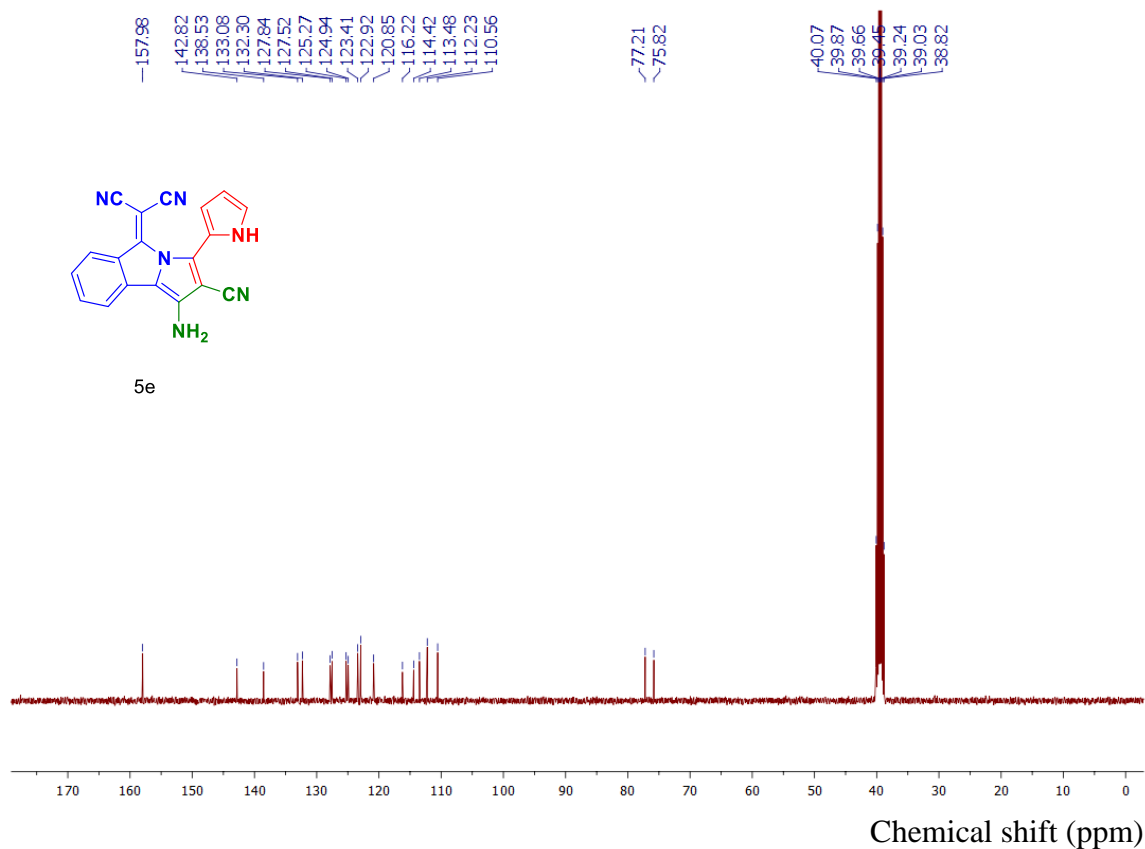

$^1\text{H}$  NMR Spectra of **5f** (400 MHz,  $\text{DMSO-}d_6$ )

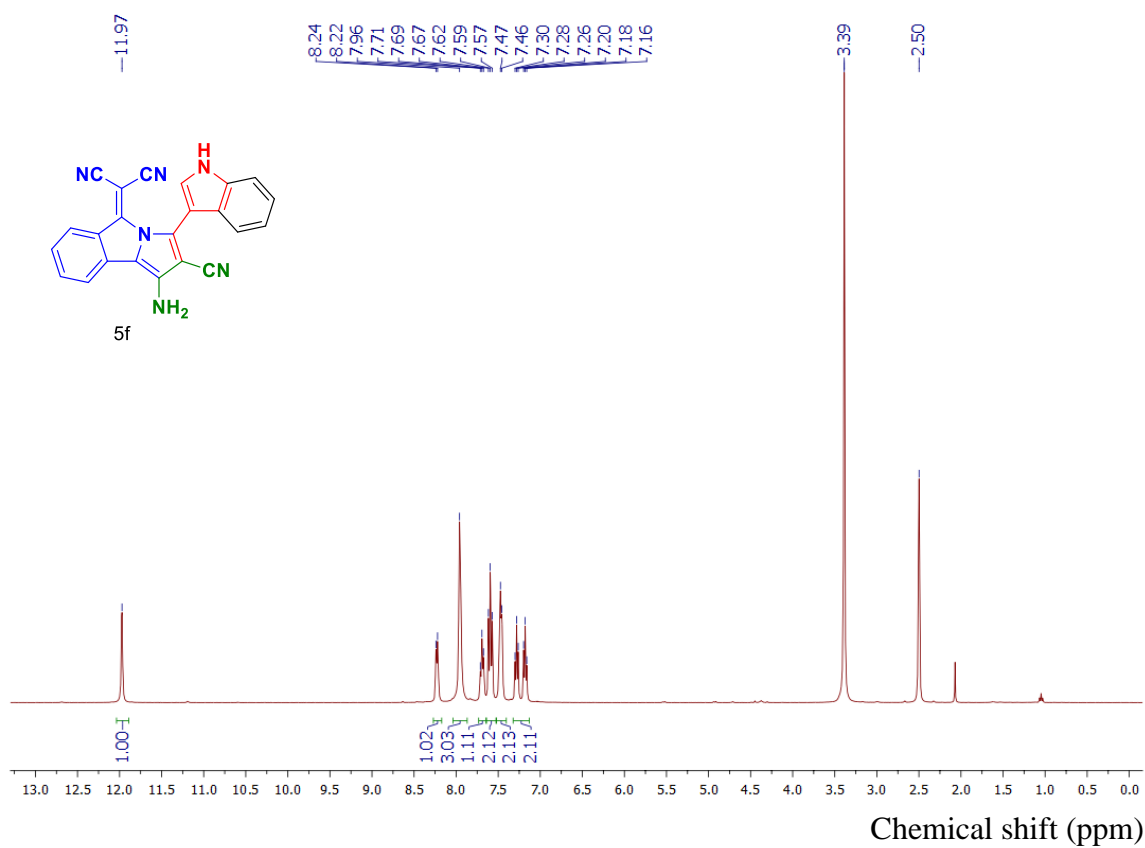

$^{13}\text{C}$  NMR Spectra of **5f** (400 MHz,  $\text{DMSO-}d_6$ )

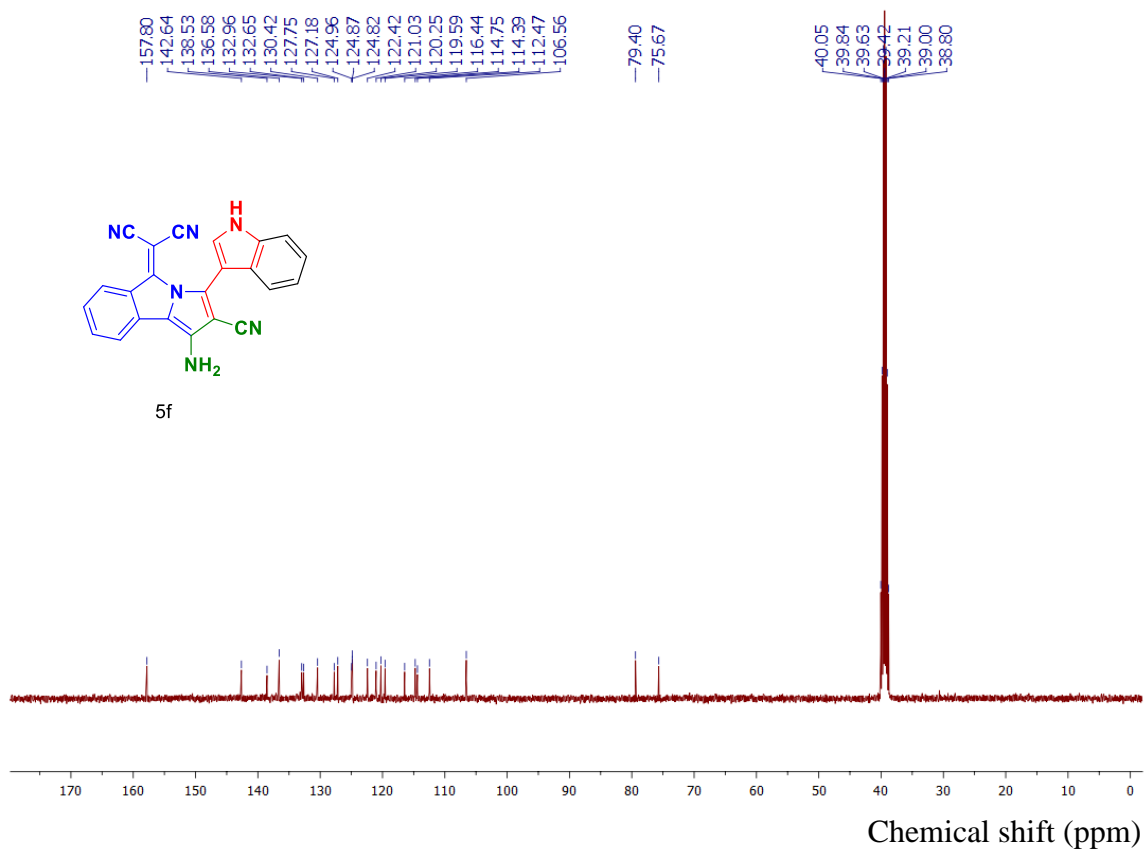

<sup>1</sup>H NMR Spectra of **5g** (400 MHz, CDCl<sub>3</sub>/CF<sub>3</sub>COOD)

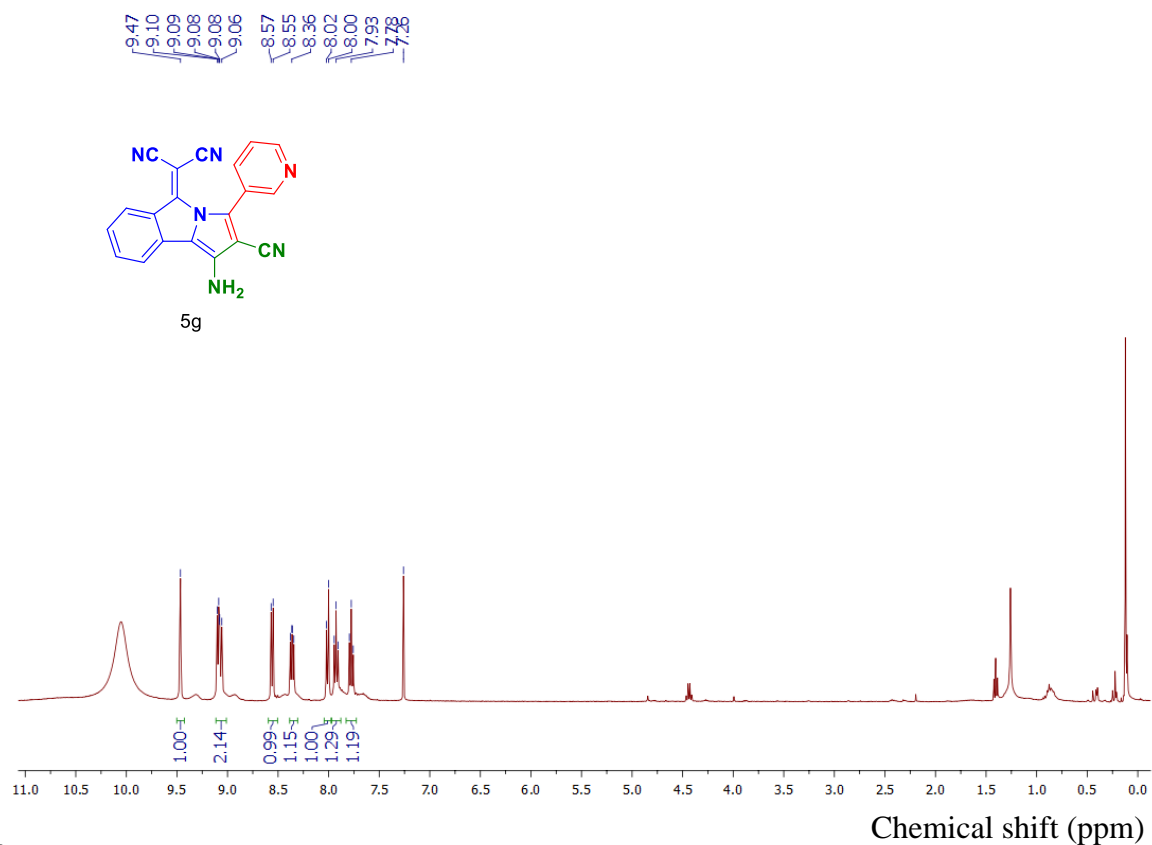

<sup>13</sup>C NMR Spectra of **5g** (400 MHz, CDCl<sub>3</sub>/CF<sub>3</sub>COOD)

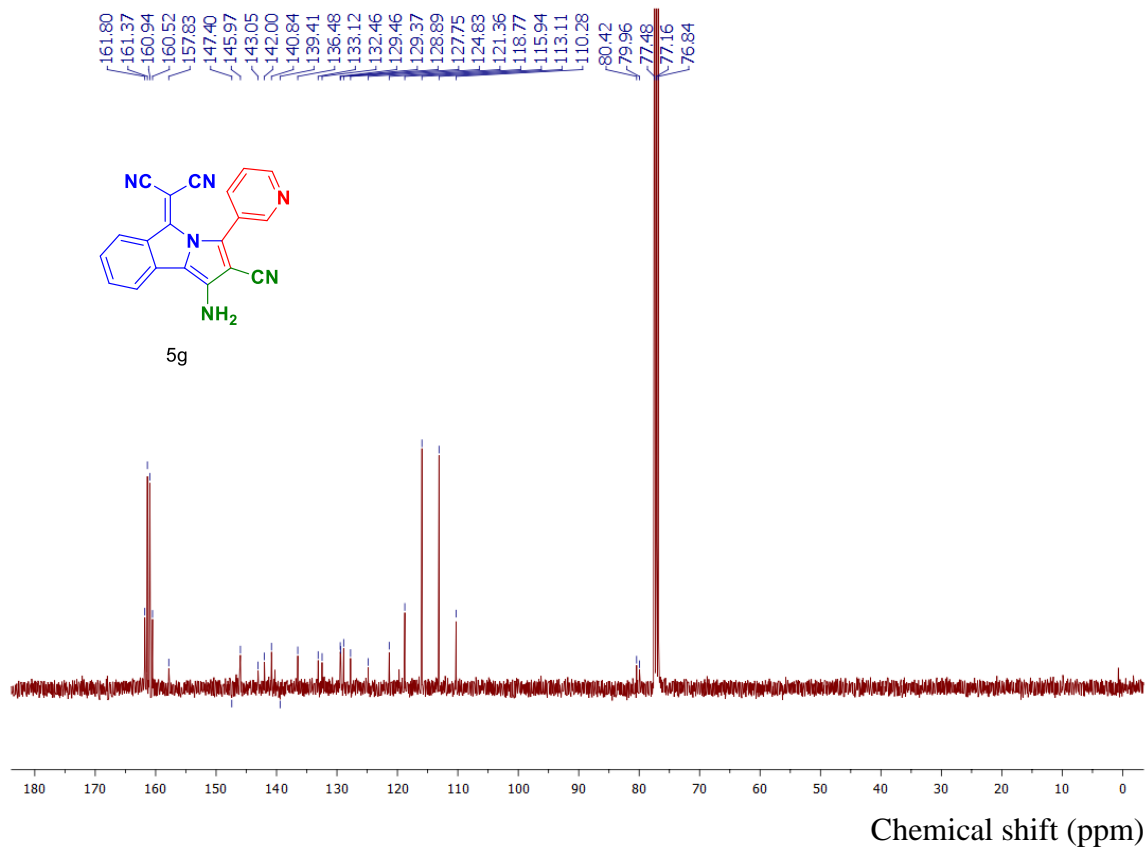

<sup>1</sup>H NMR Spectra of **5h** (400 MHz, DMSO-*d*<sub>6</sub>)

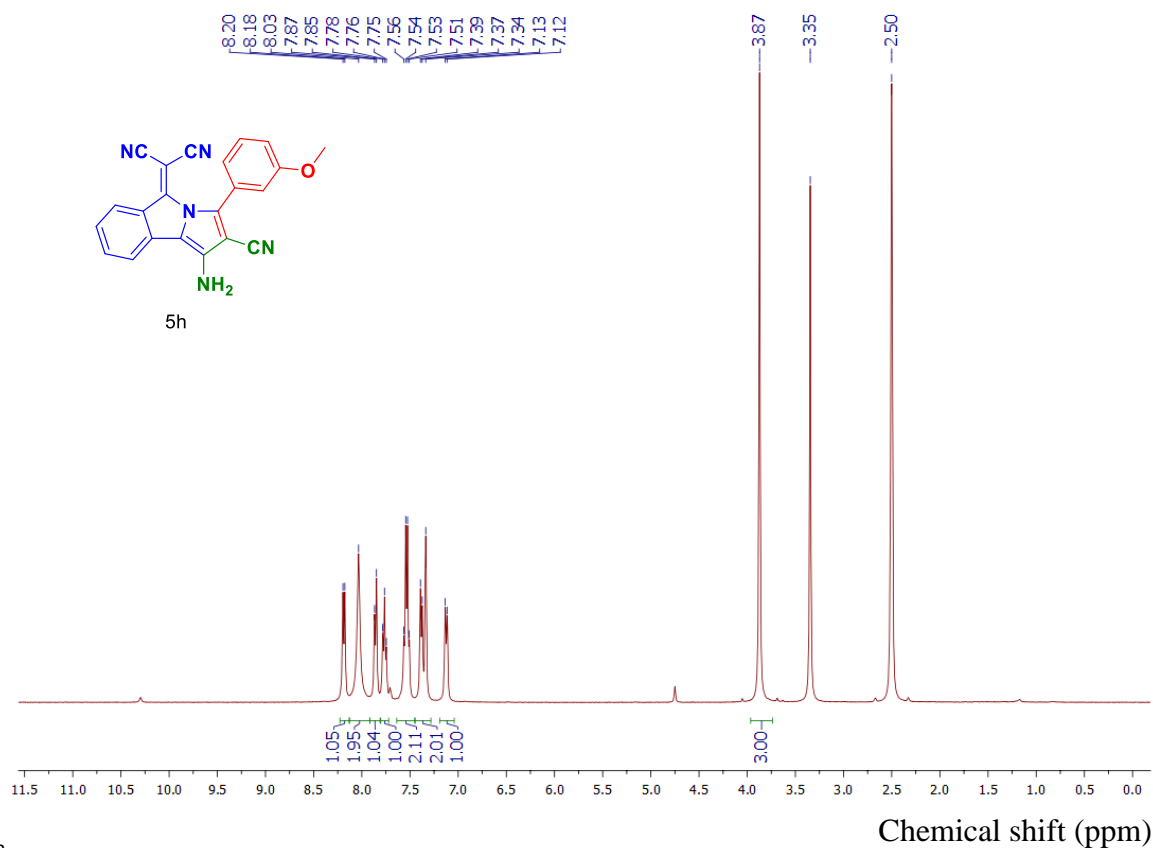

<sup>13</sup>C NMR Spectra of **5h** (400 MHz, DMSO-*d*<sub>6</sub>)

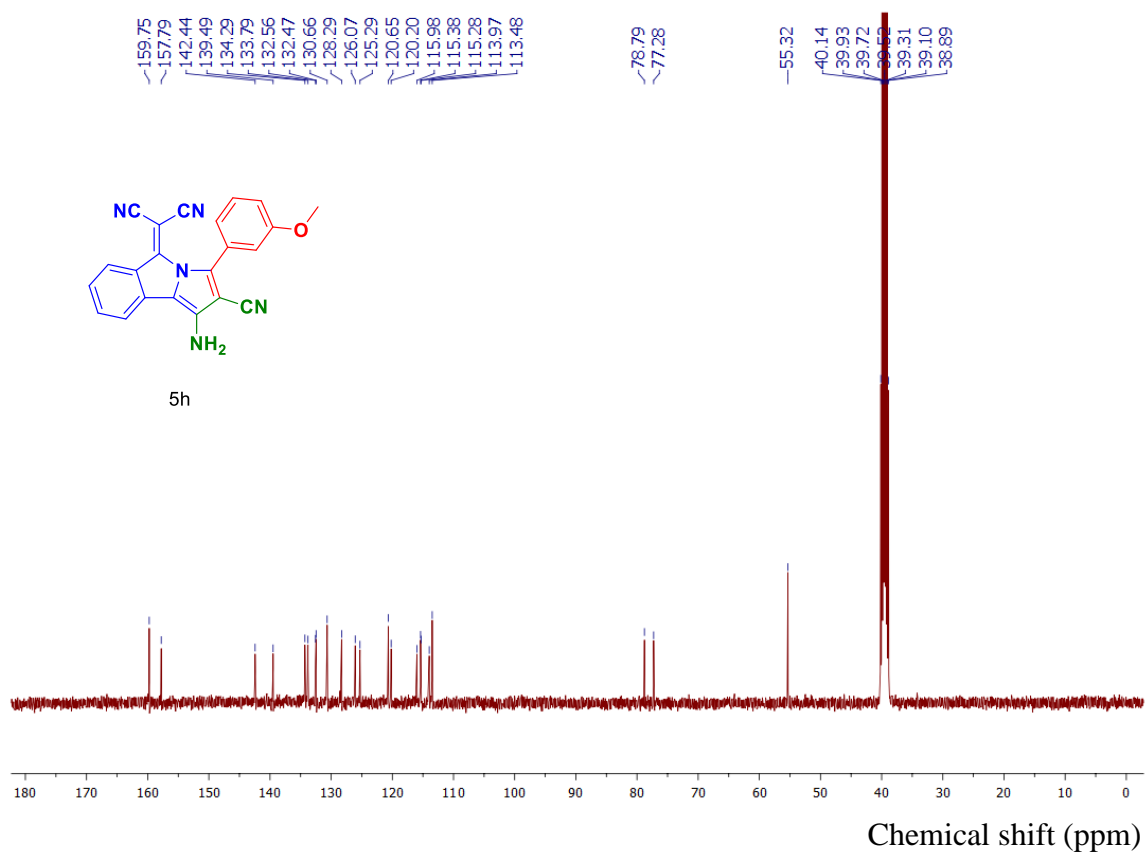

<sup>1</sup>H NMR Spectra of **5i** (400 MHz, DMSO-*d*<sub>6</sub>)

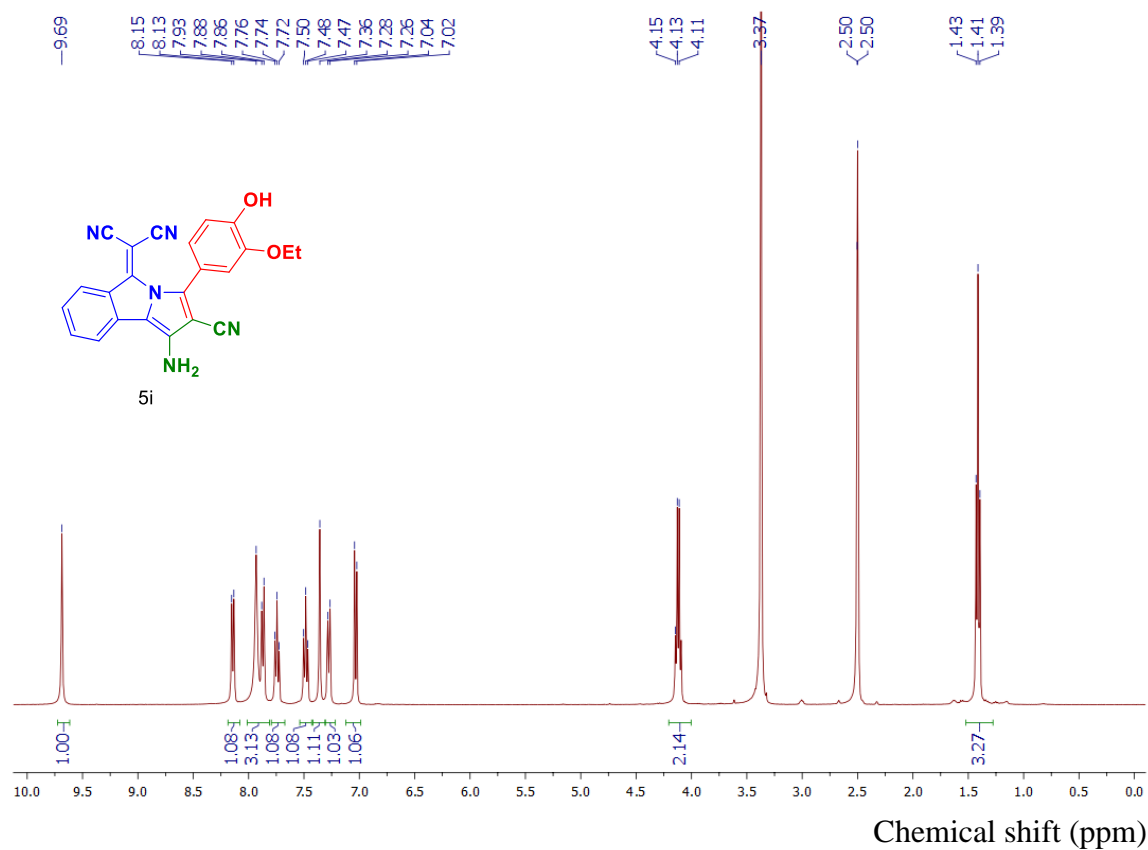

<sup>13</sup>C NMR Spectra of **5i** (400 MHz, DMSO-*d*<sub>6</sub>)

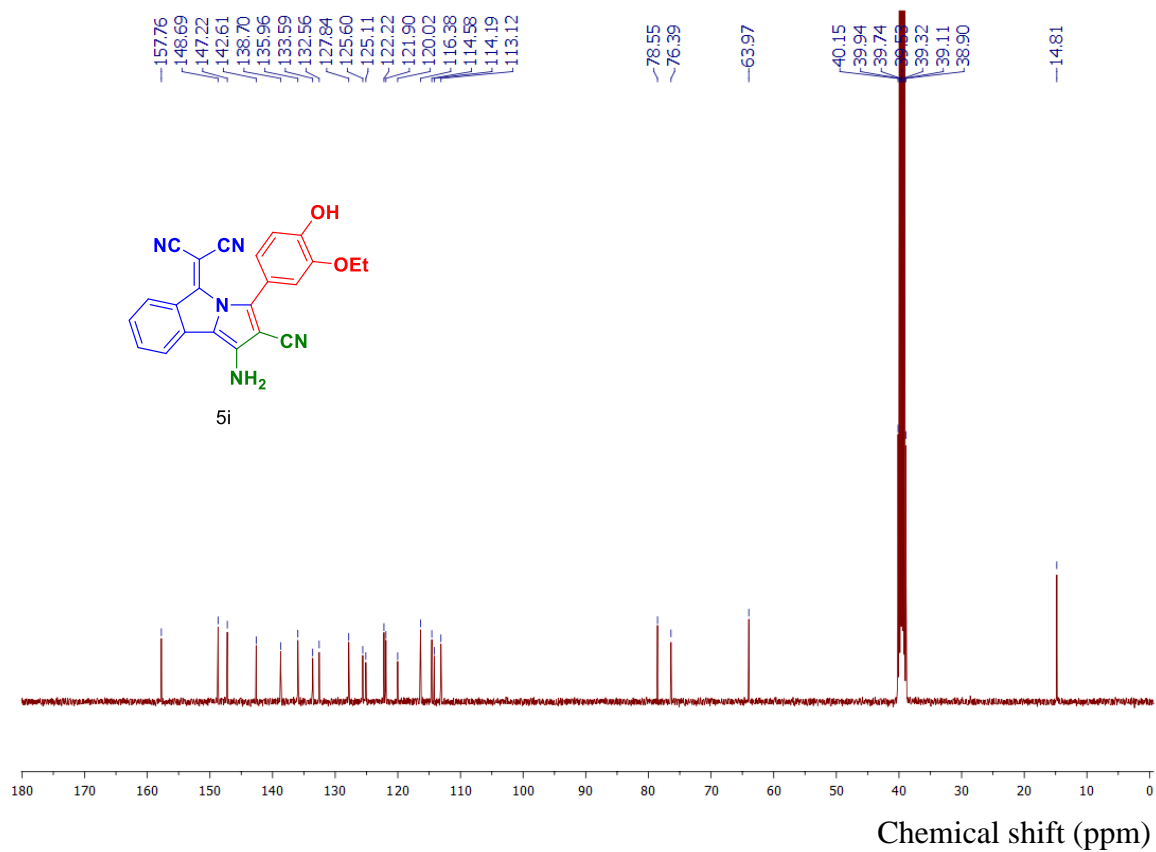



<sup>1</sup>H NMR Spectra of **5j** (400 MHz, DMSO-*d*<sub>6</sub>)

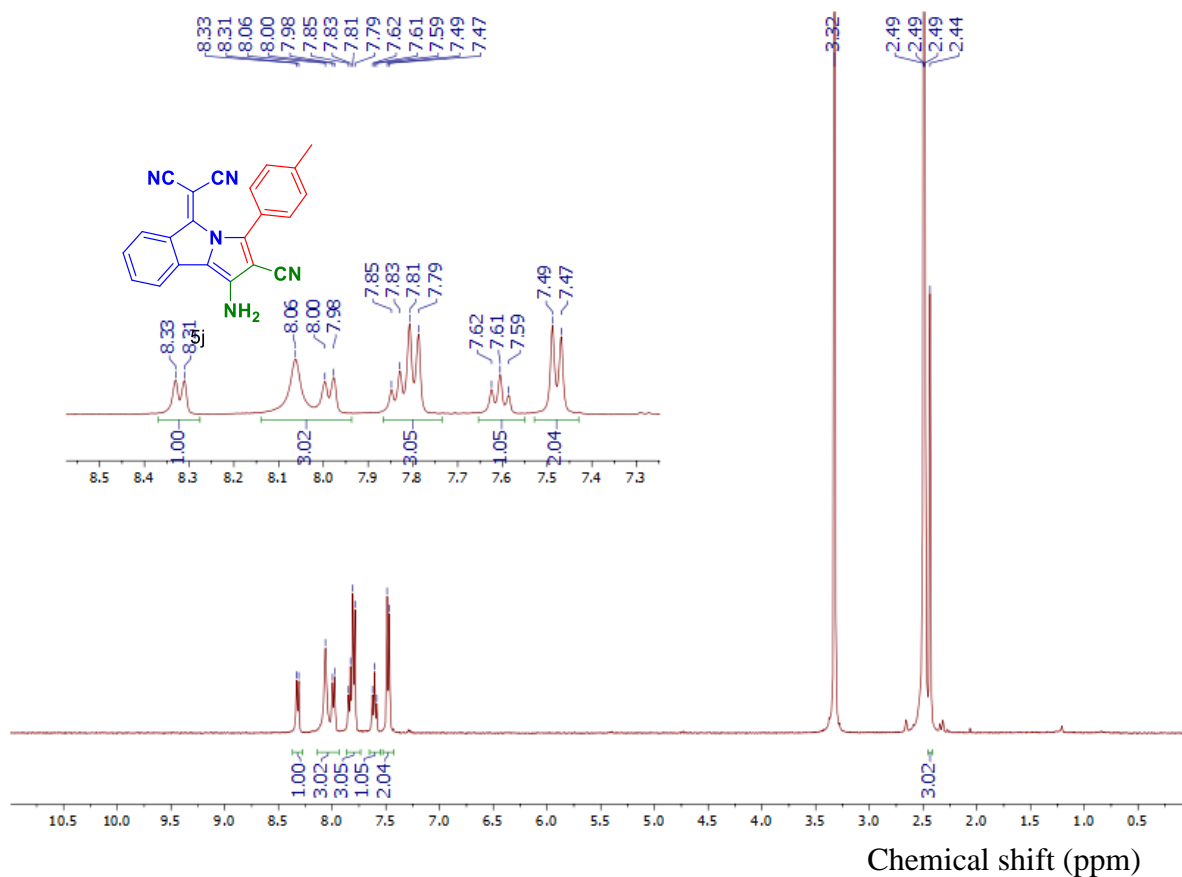

<sup>13</sup>C NMR Spectra of **5j** (400 MHz, DMSO-*d*<sub>6</sub>)

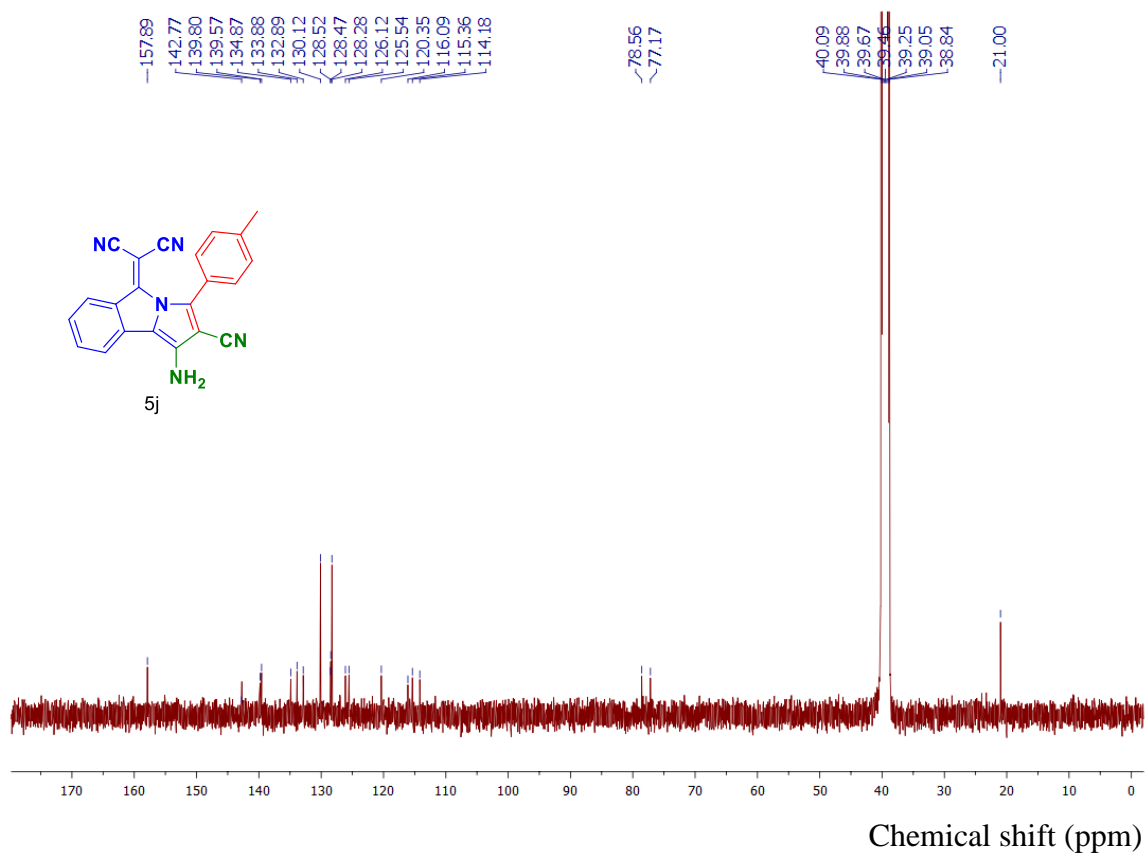

<sup>1</sup>H NMR Spectra of **5k** (400 MHz, DMSO-*d*<sub>6</sub>)

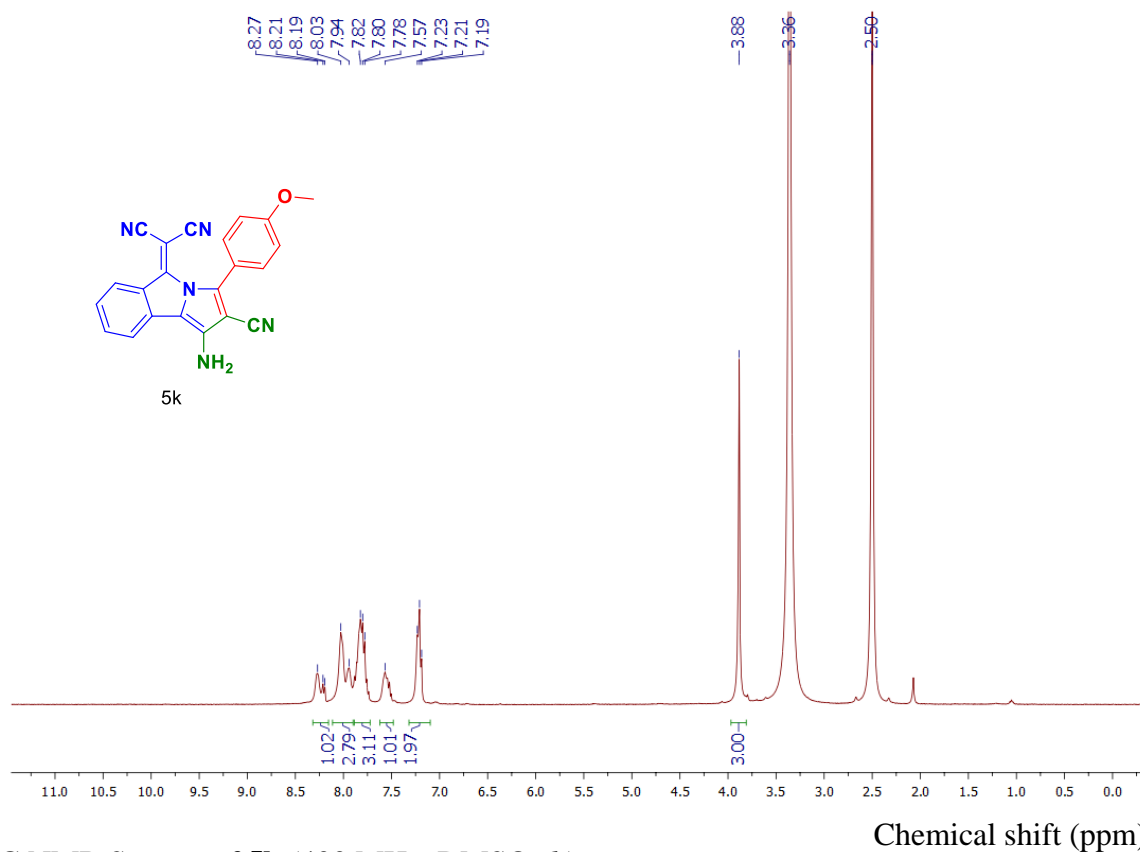

<sup>13</sup>C NMR Spectra of **5k** (400 MHz, DMSO-*d*<sub>6</sub>)

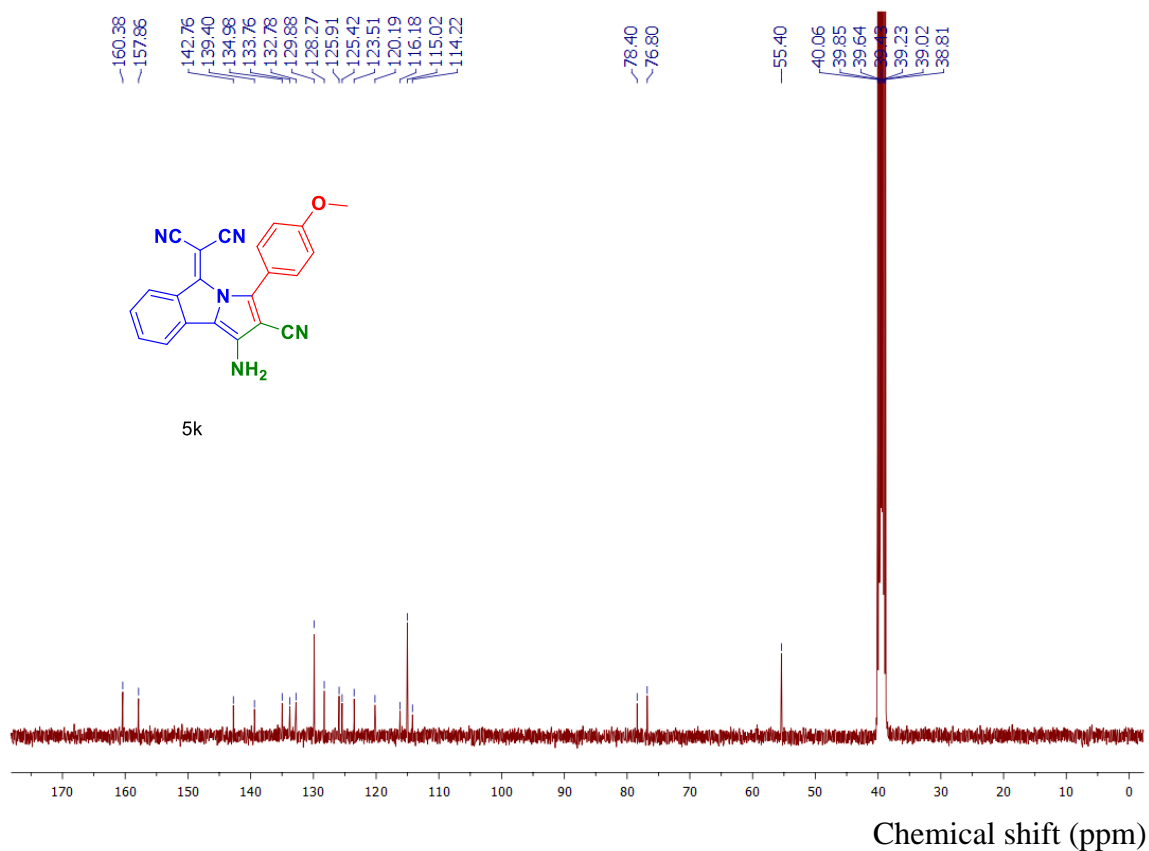

<sup>1</sup>H NMR Spectra of **5l** (400 MHz, DMSO-*d*<sub>6</sub>)

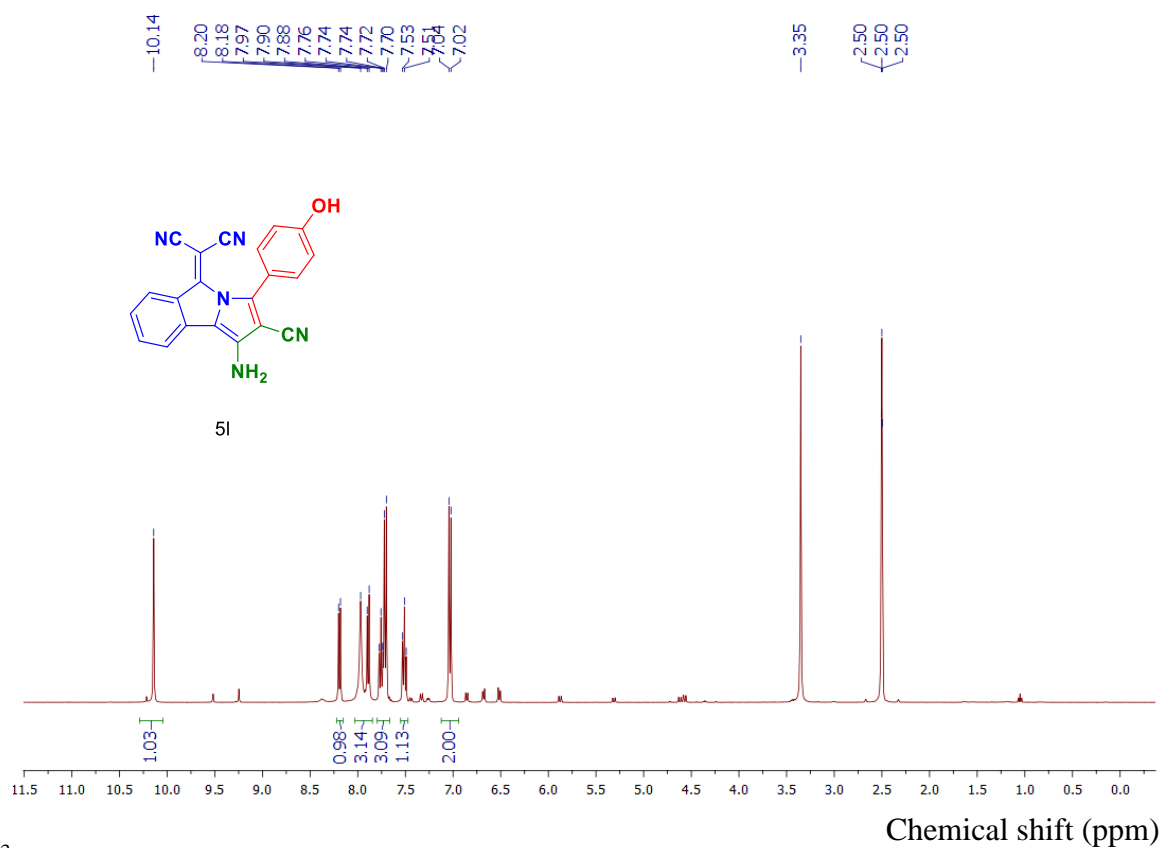

<sup>13</sup>C NMR Spectra of **5l** (400 MHz, DMSO-*d*<sub>6</sub>)

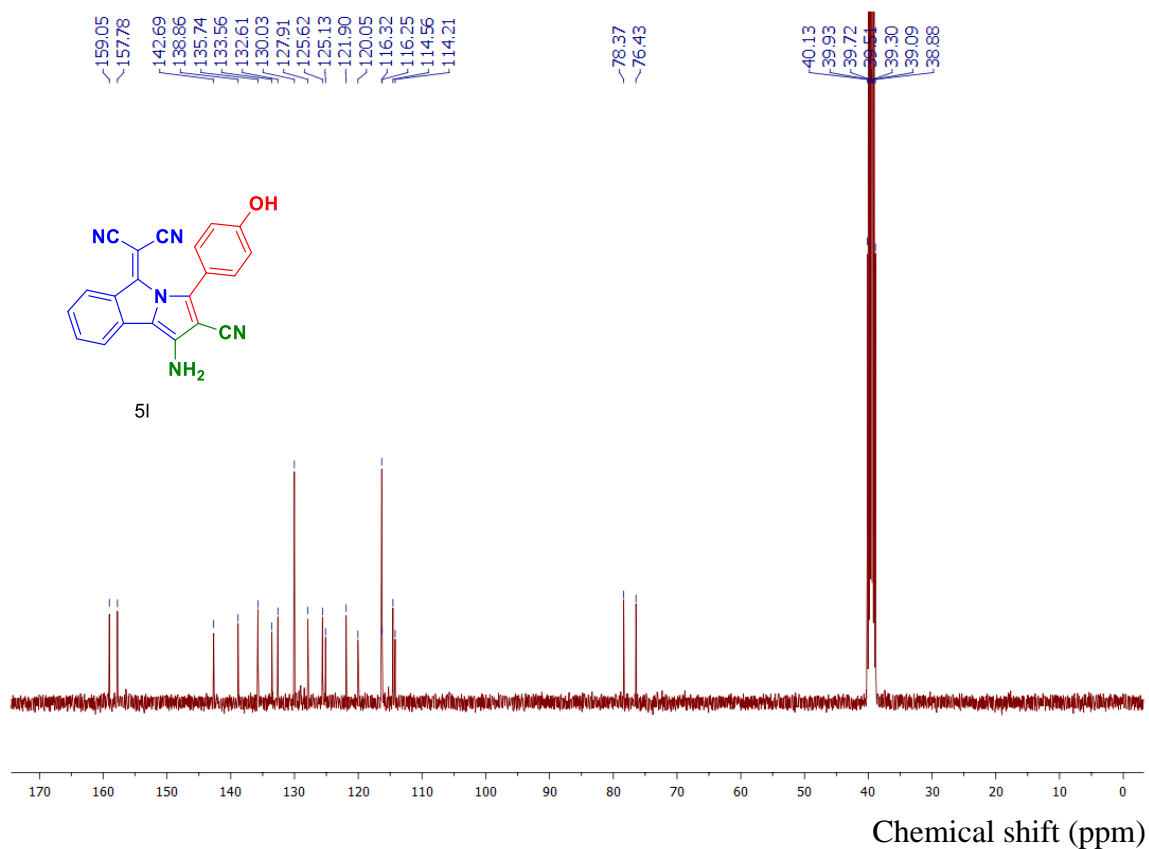

<sup>1</sup>H NMR Spectra of **5m** (400 MHz, DMSO-*d*<sub>6</sub>)

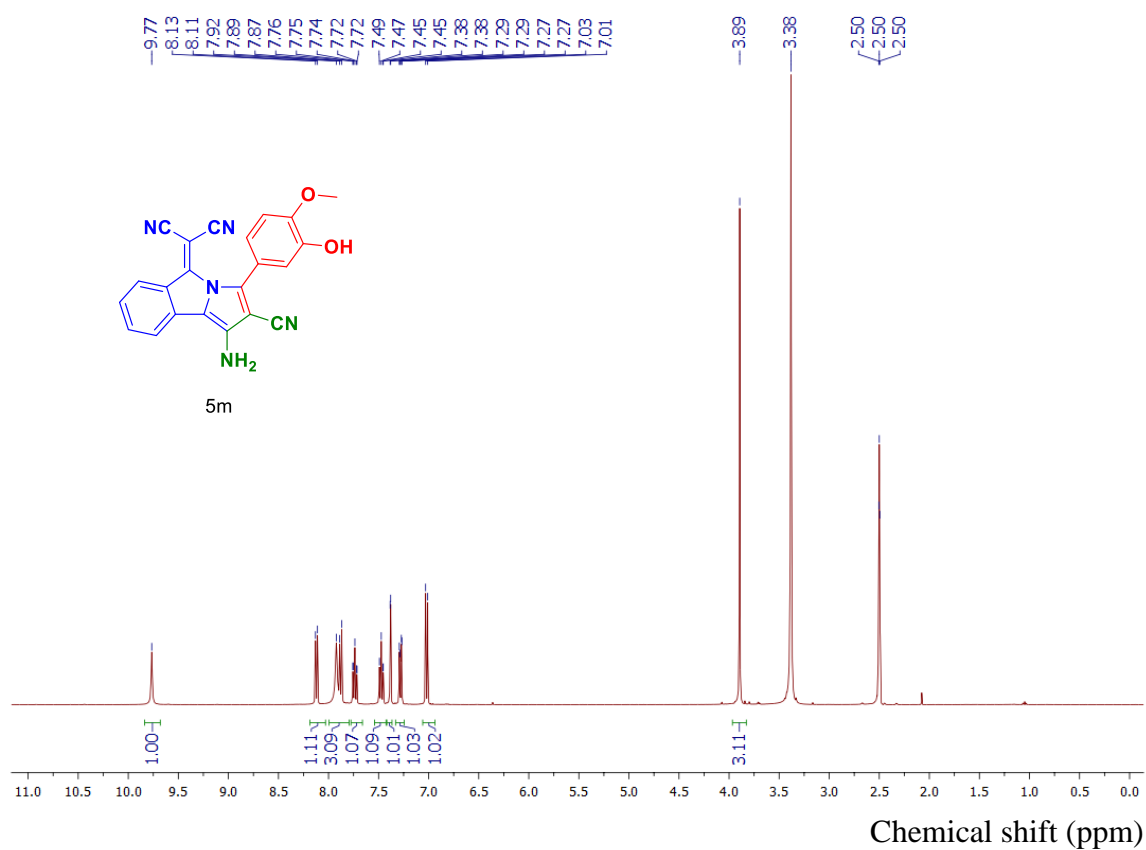

<sup>13</sup>C NMR Spectra of **5m** (400 MHz, DMSO-*d*<sub>6</sub>)

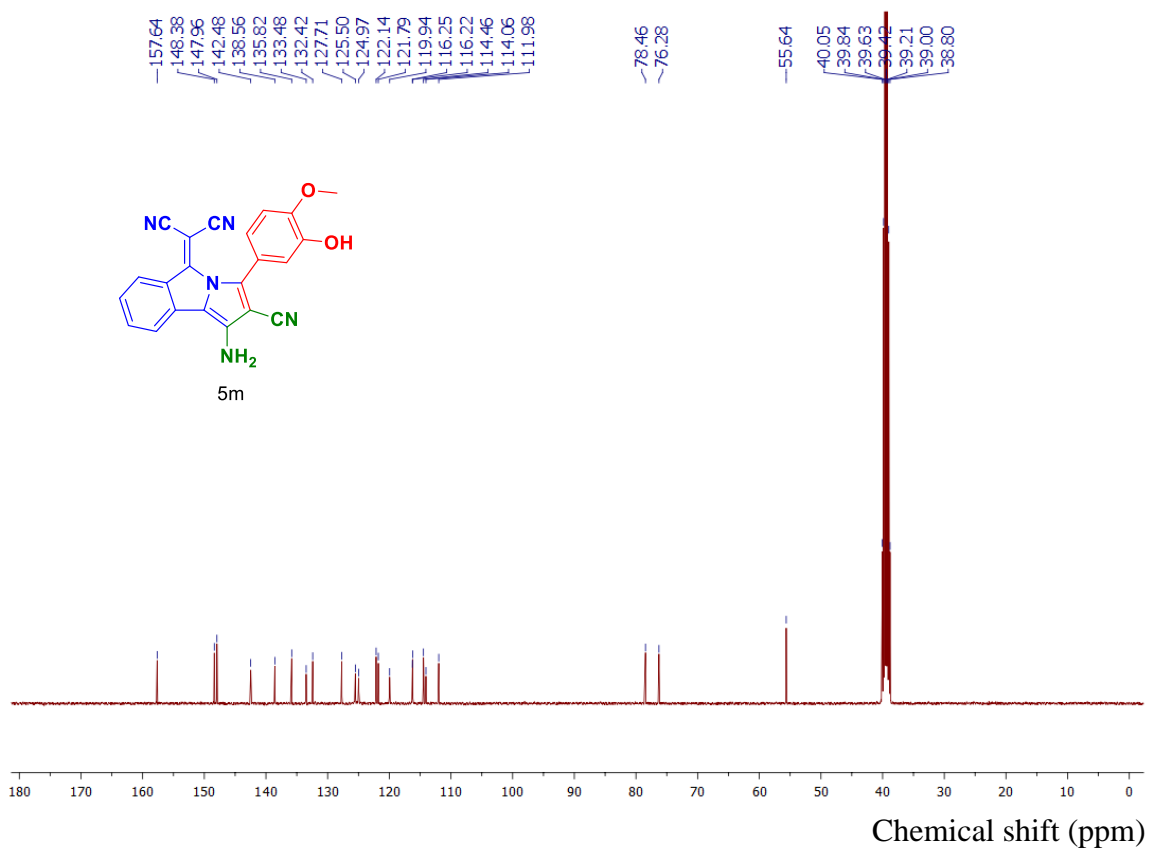

$^1\text{H}$  NMR Spectra of **5n** (400 MHz,  $\text{DMSO-}d_6$ )

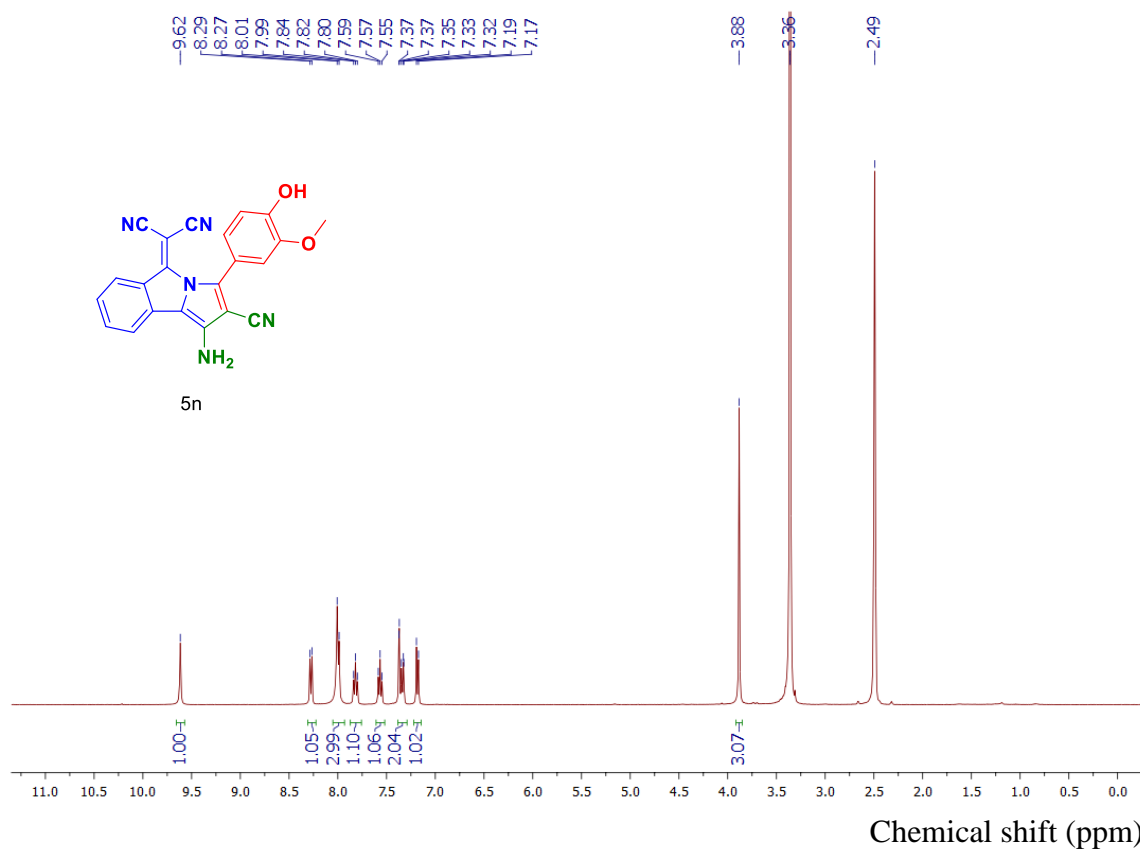

$^{13}\text{C}$  NMR Spectra of **5n** (400 MHz,  $\text{DMSO-}d_6$ )

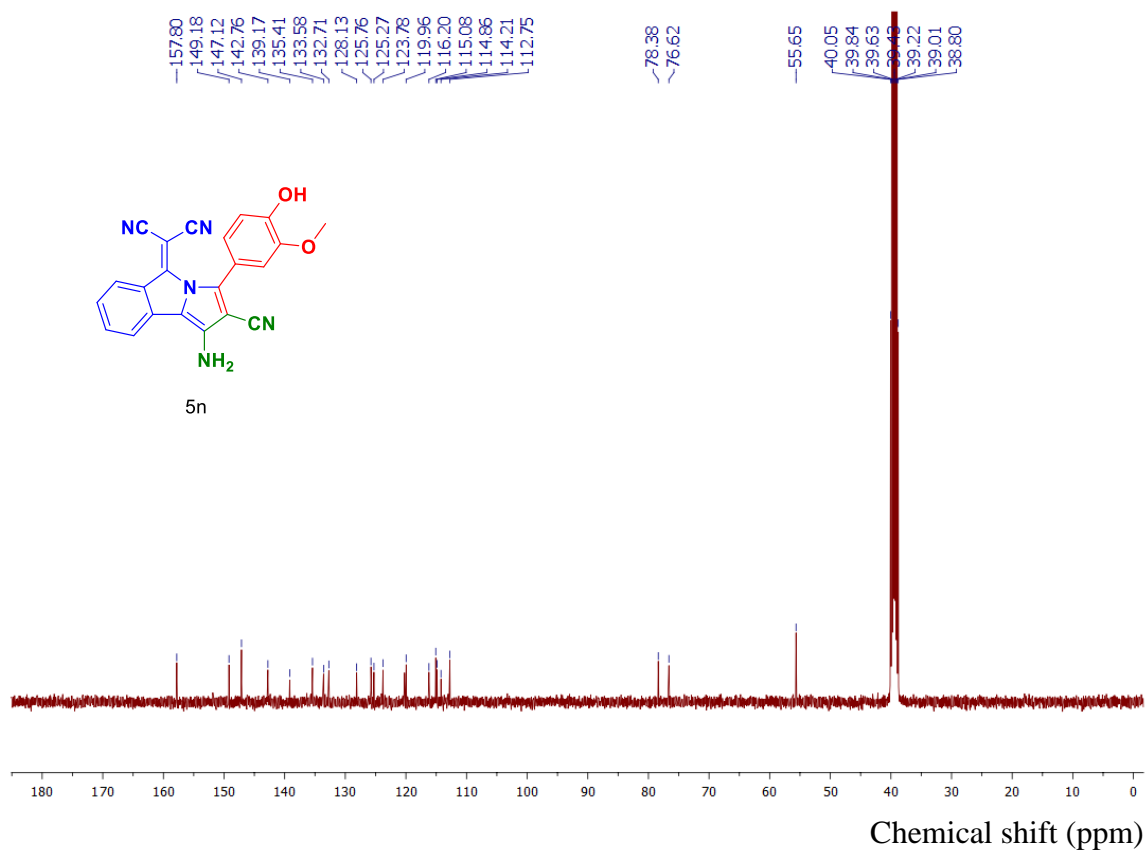

<sup>1</sup>H NMR Spectra of **5o** (400 MHz, DMSO-*d*<sub>6</sub>)

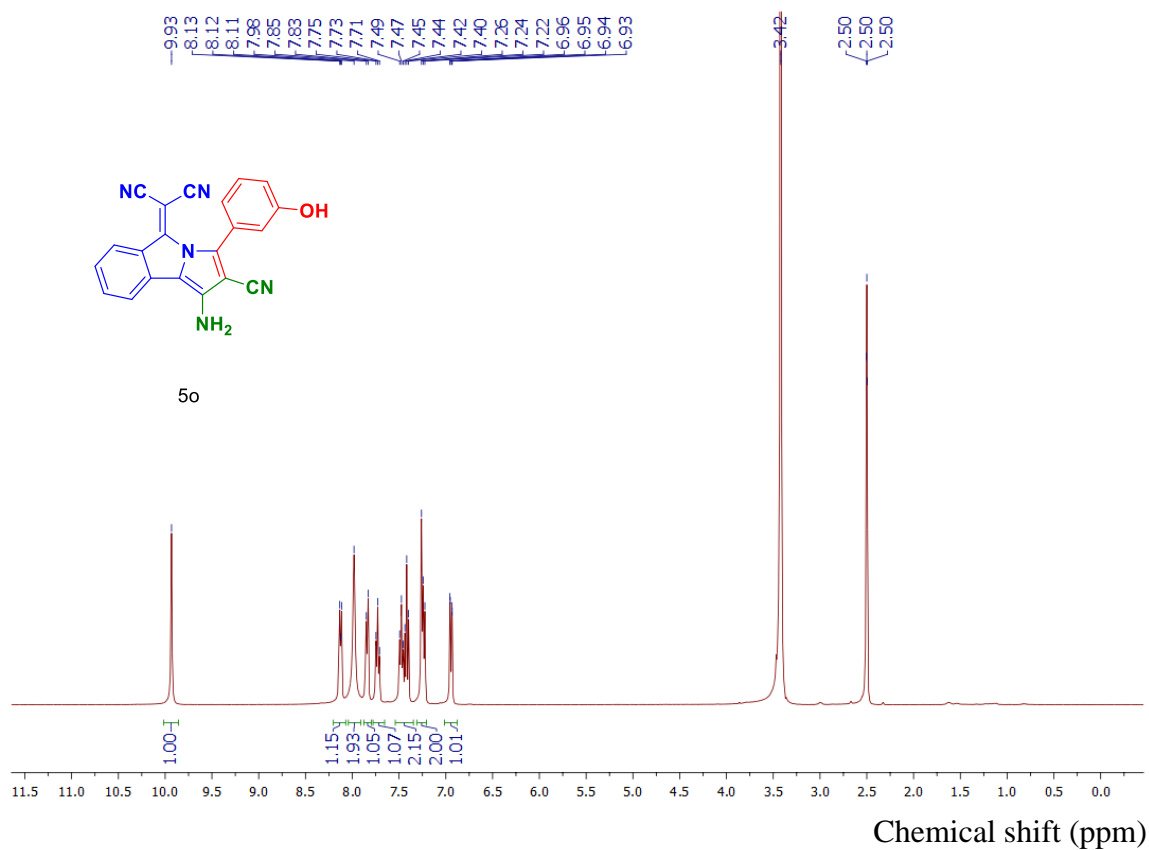

<sup>13</sup>C NMR Spectra of **5o** (400 MHz, DMSO-*d*<sub>6</sub>)

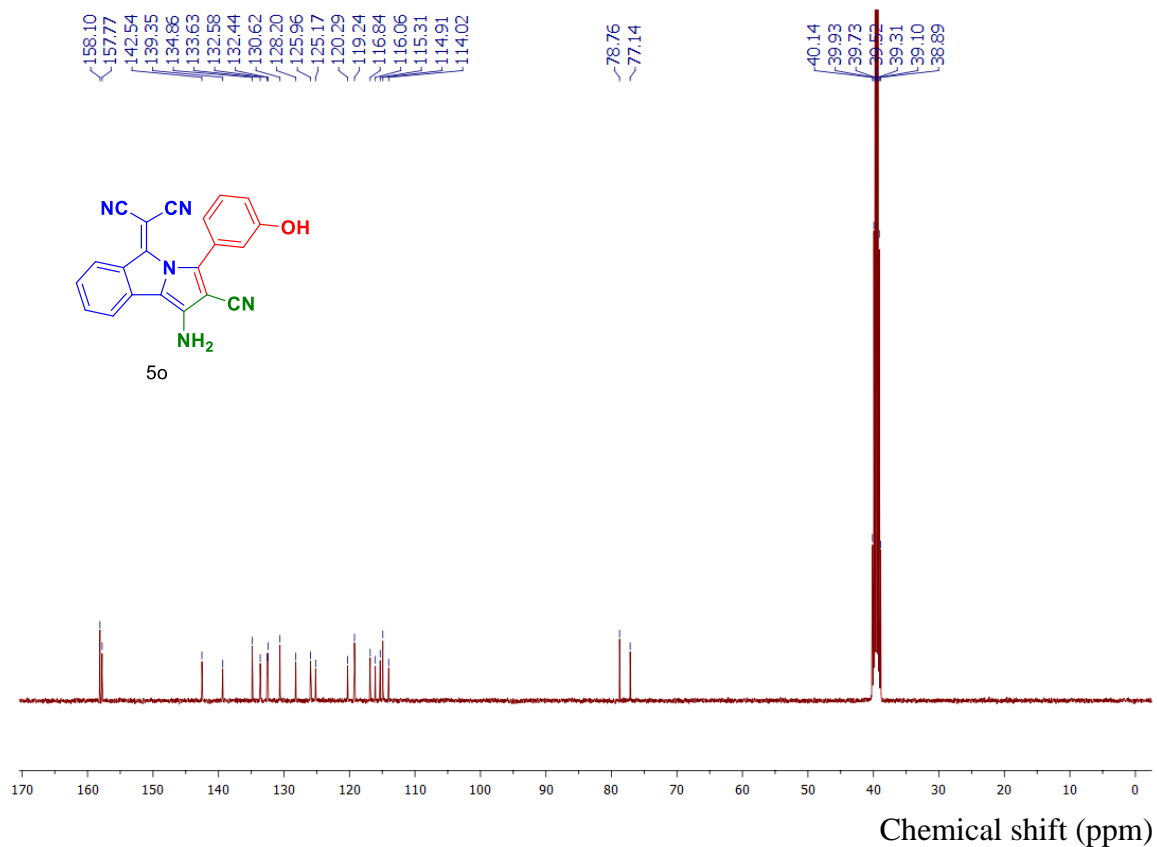

<sup>1</sup>H NMR Spectra of **5p** (400 MHz, DMSO-*d*<sub>6</sub>)

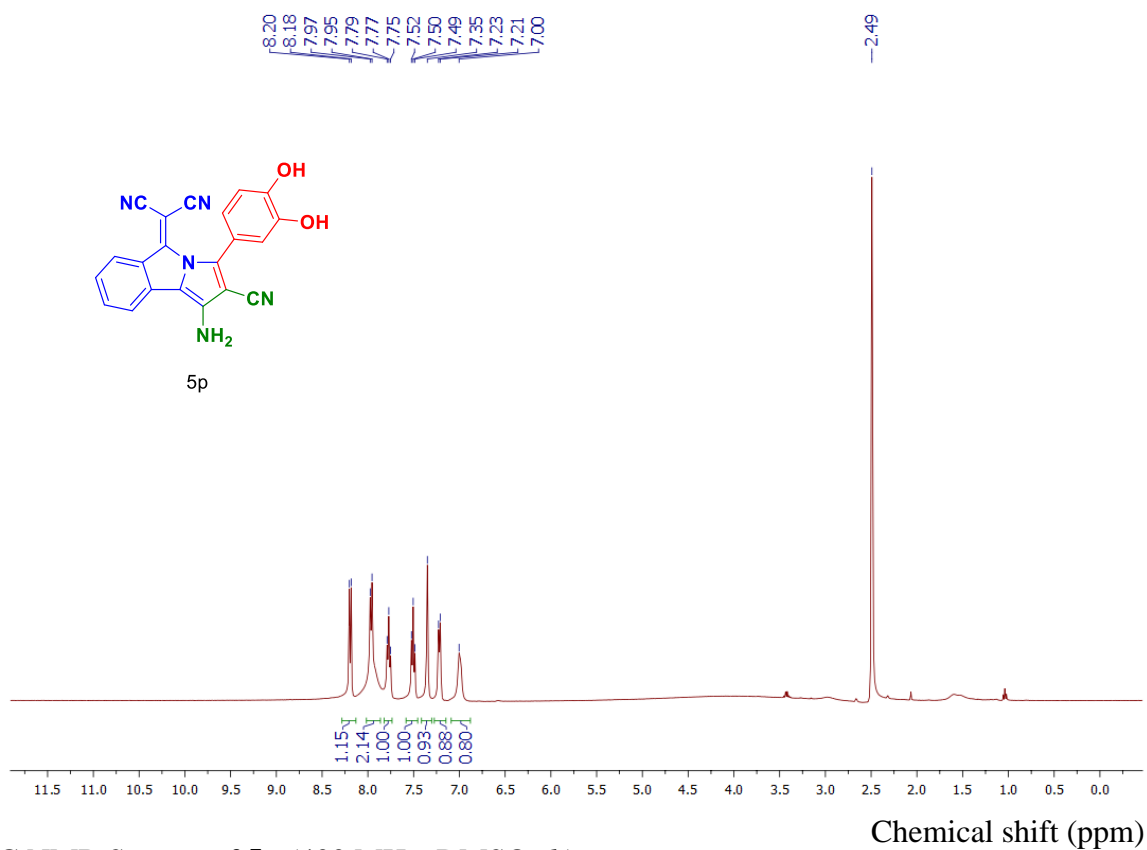

<sup>13</sup>C NMR Spectra of **5p** (400 MHz, DMSO-*d*<sub>6</sub>)

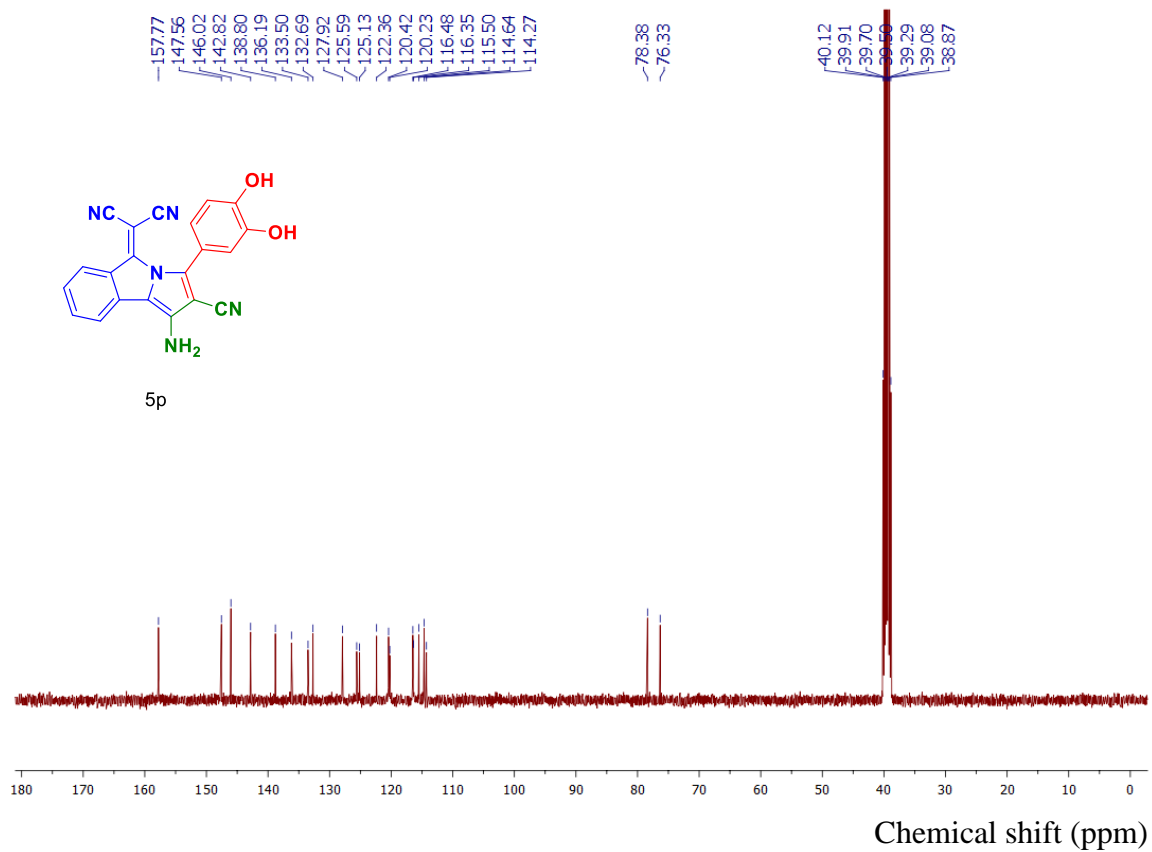

<sup>1</sup>H NMR Spectra of **6a** (400 MHz, DMSO-*d*<sub>6</sub>)

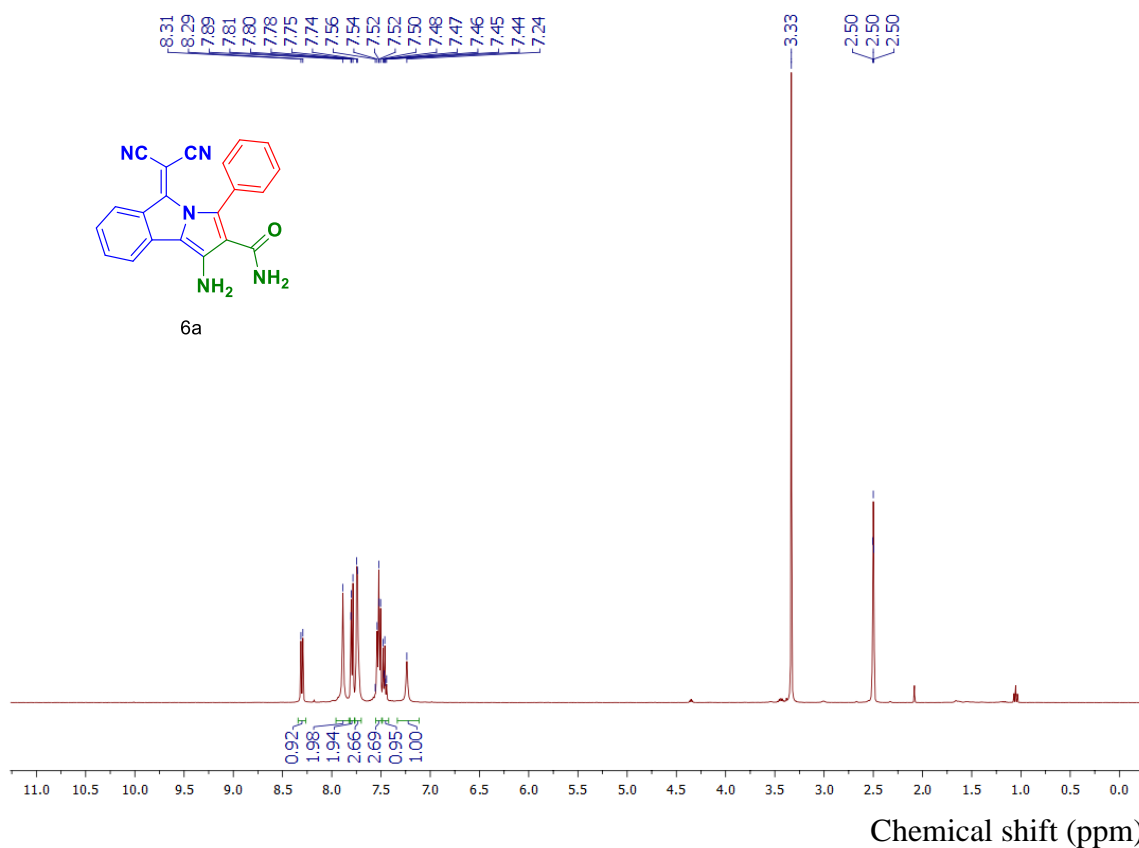

<sup>13</sup>C NMR Spectra of **6a** (400 MHz, DMSO-*d*<sub>6</sub>)

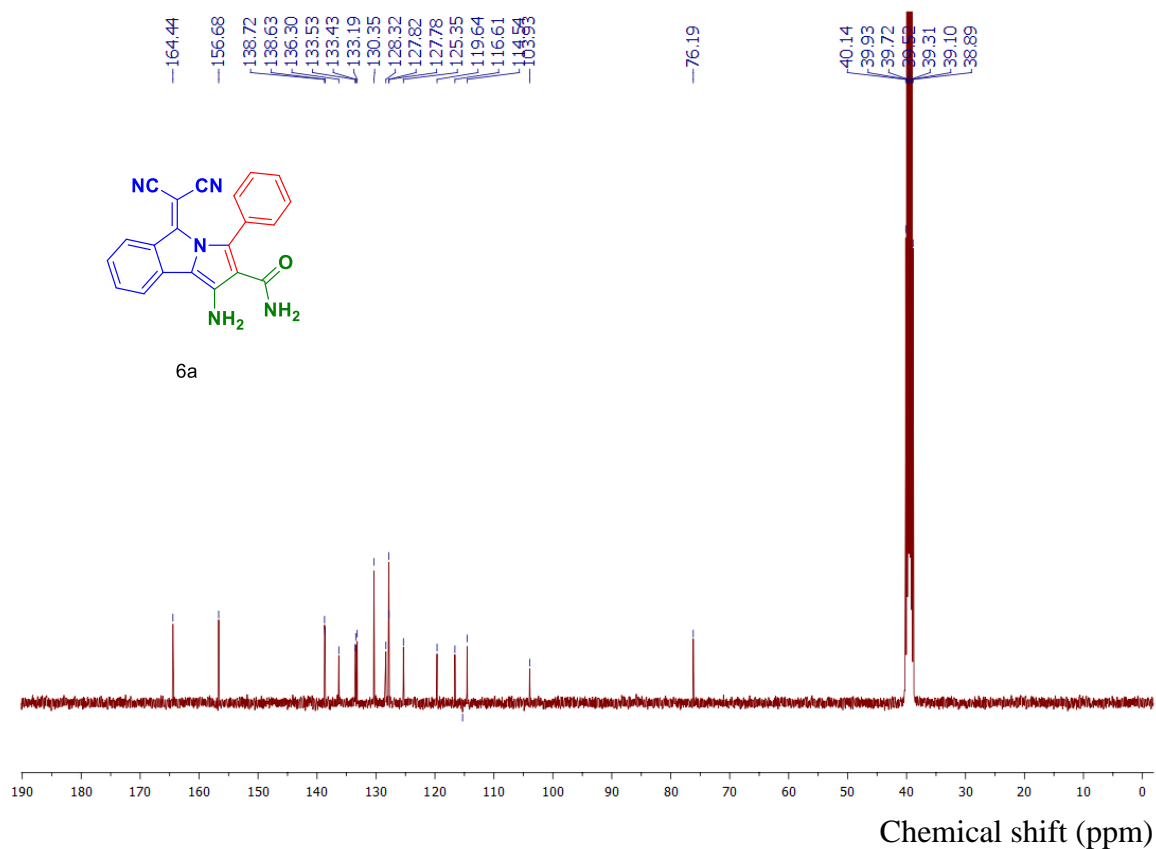



<sup>1</sup>H NMR Spectra of **6b** (400 MHz, DMSO-*d*<sub>6</sub>)

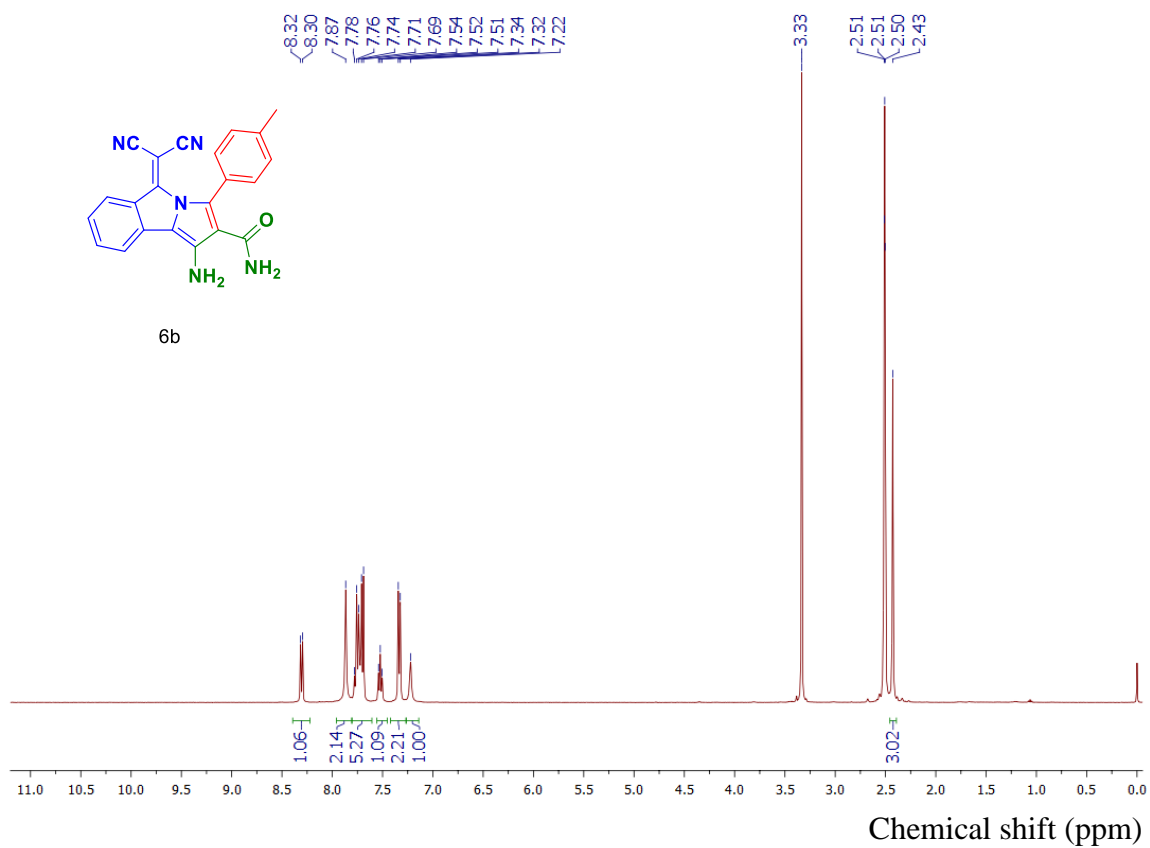

<sup>13</sup>C NMR Spectra of **6b** (400 MHz, DMSO-*d*<sub>6</sub>)

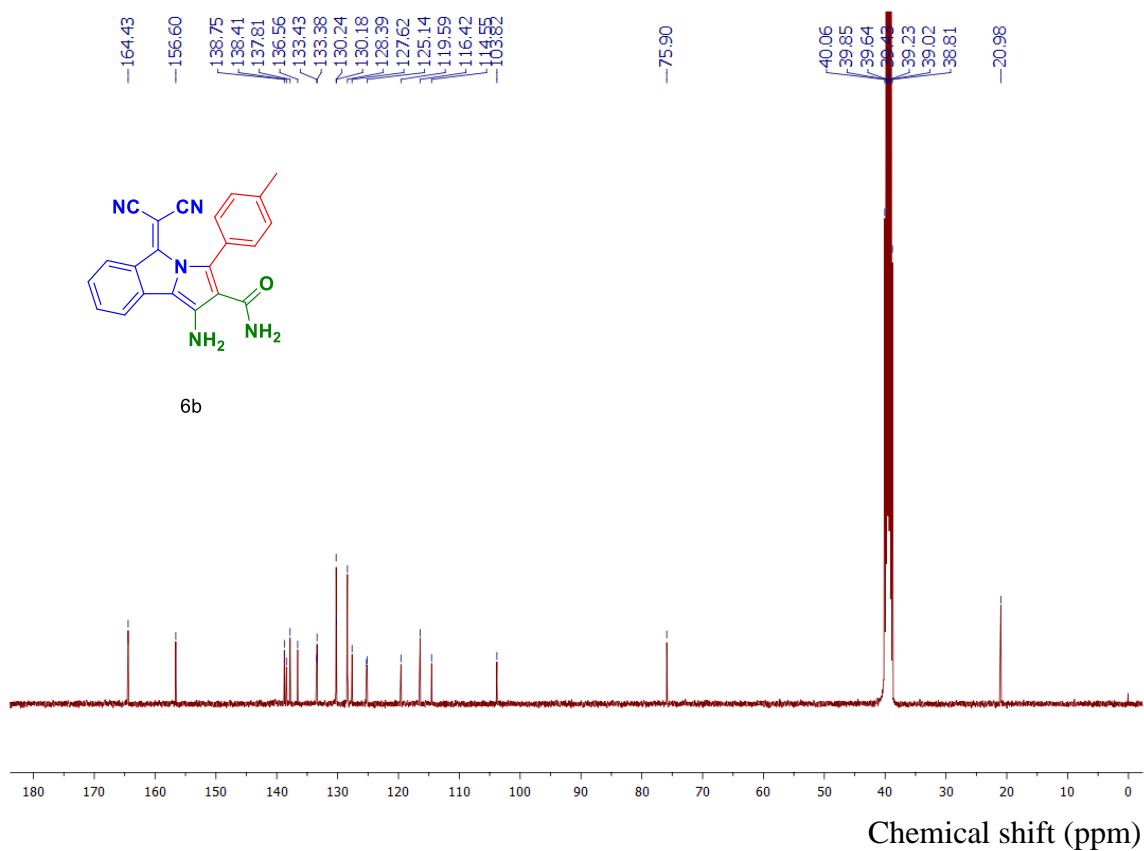

<sup>1</sup>H NMR Spectra of **6c** (400 MHz, DMSO-*d*<sub>6</sub>)

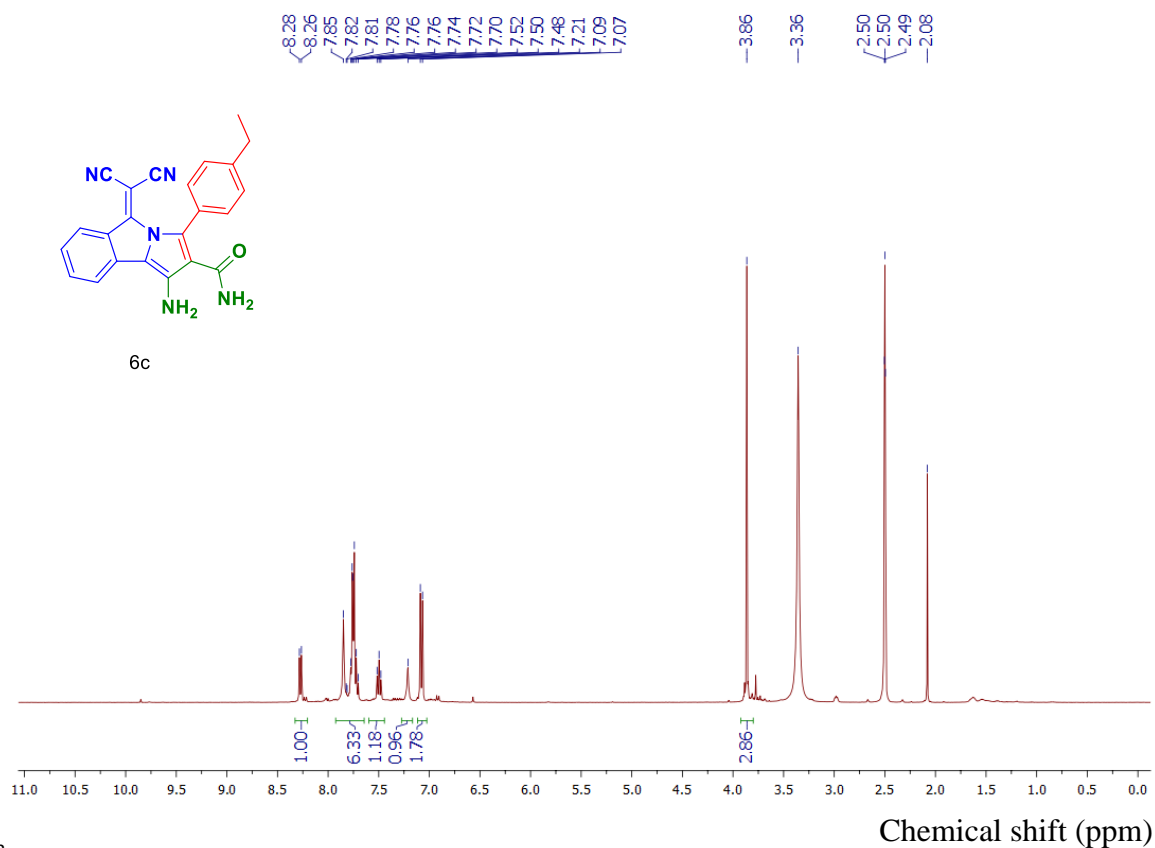

<sup>13</sup>C NMR Spectra of **6c** (400 MHz, DMSO-*d*<sub>6</sub>)

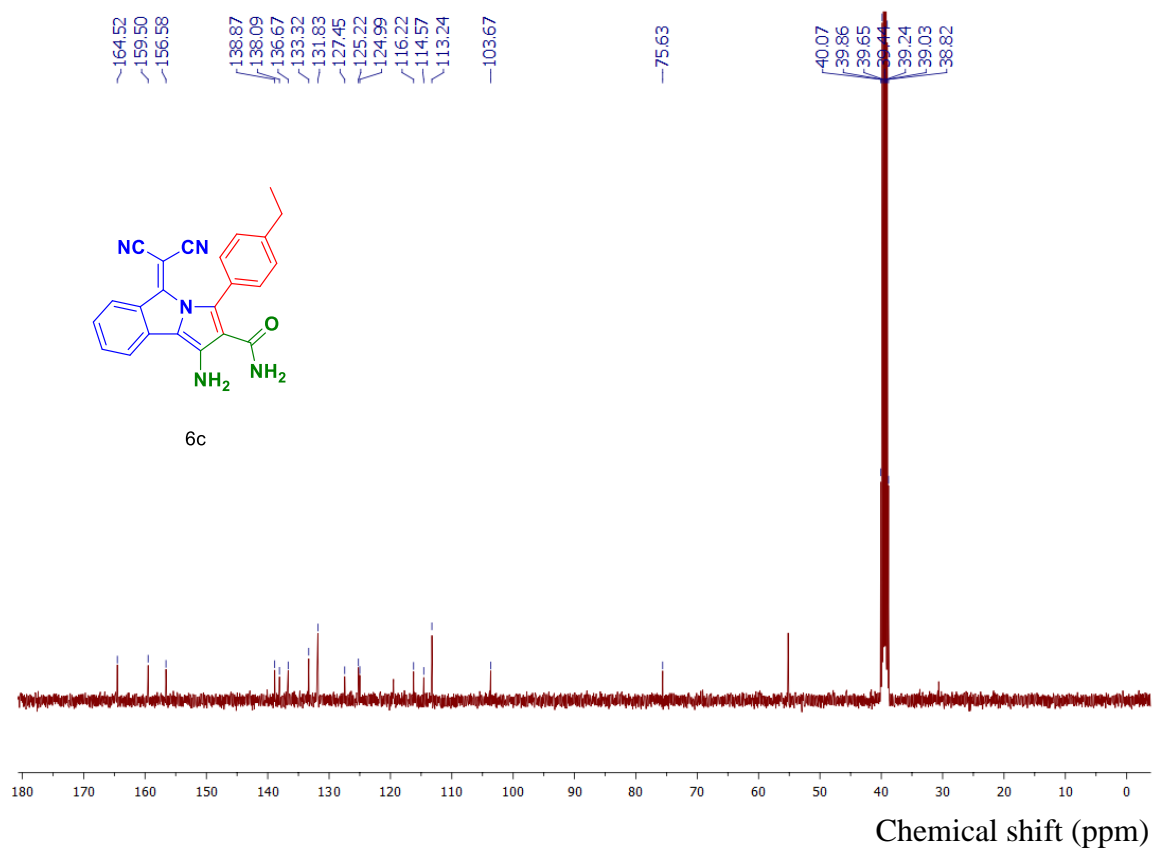

$^1\text{H}$  NMR Spectra of **6d** (400 MHz,  $\text{DMSO-}d_6$ )

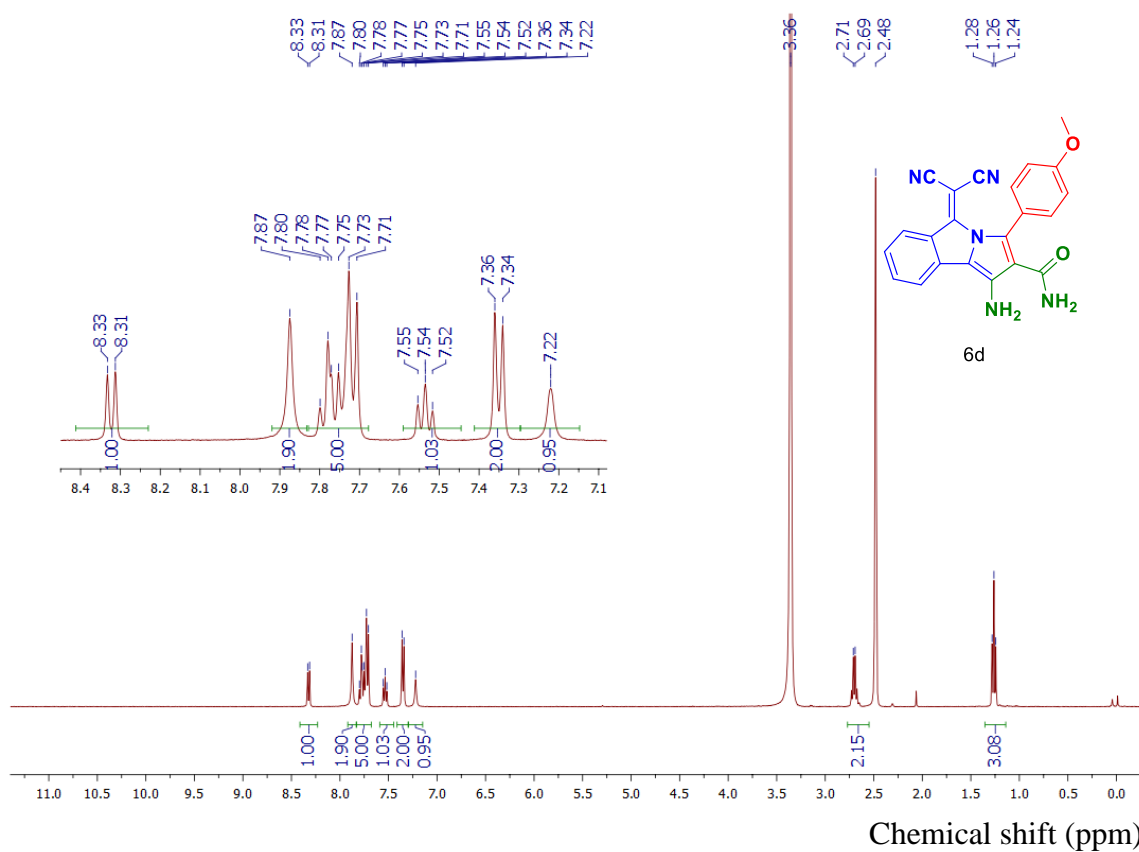

$^1\text{H}$  NMR Spectra of **6e** (400 MHz,  $\text{DMSO-}d_6$ )

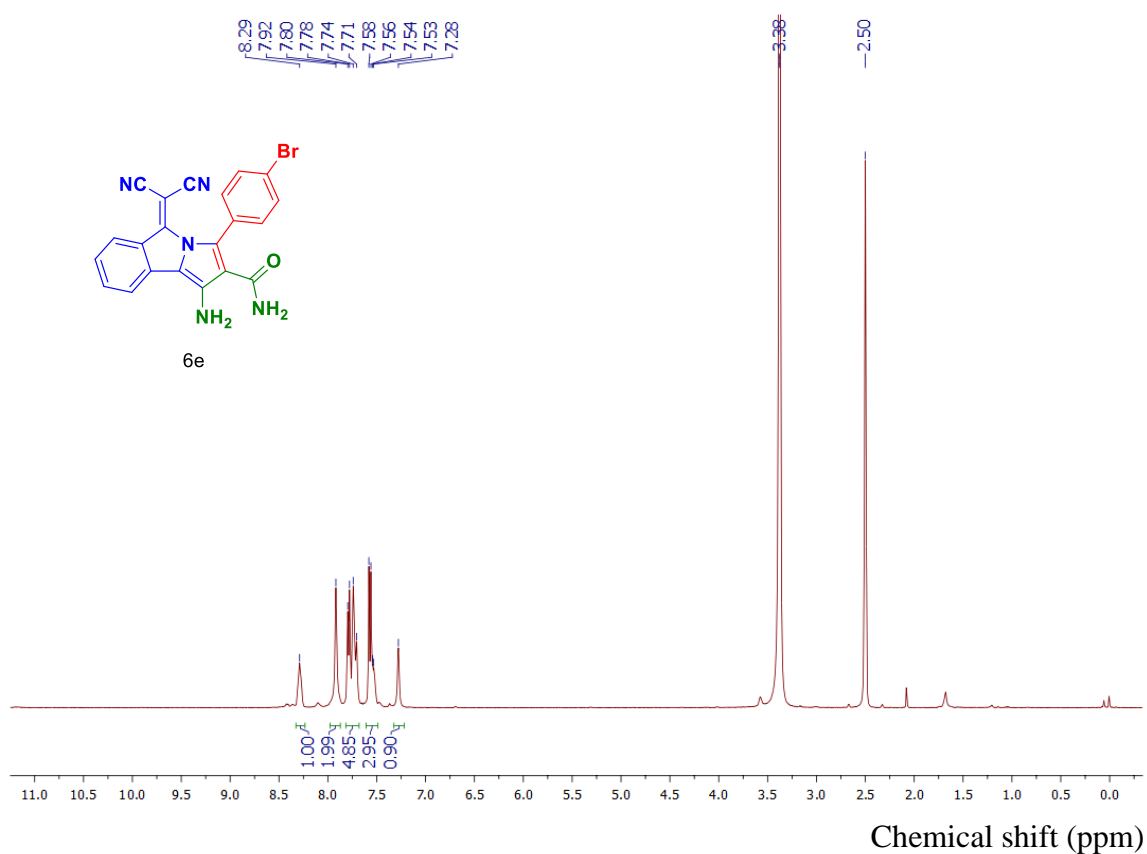

<sup>1</sup>H NMR Spectra of **6f** (400 MHz, DMSO-*d*<sub>6</sub>)

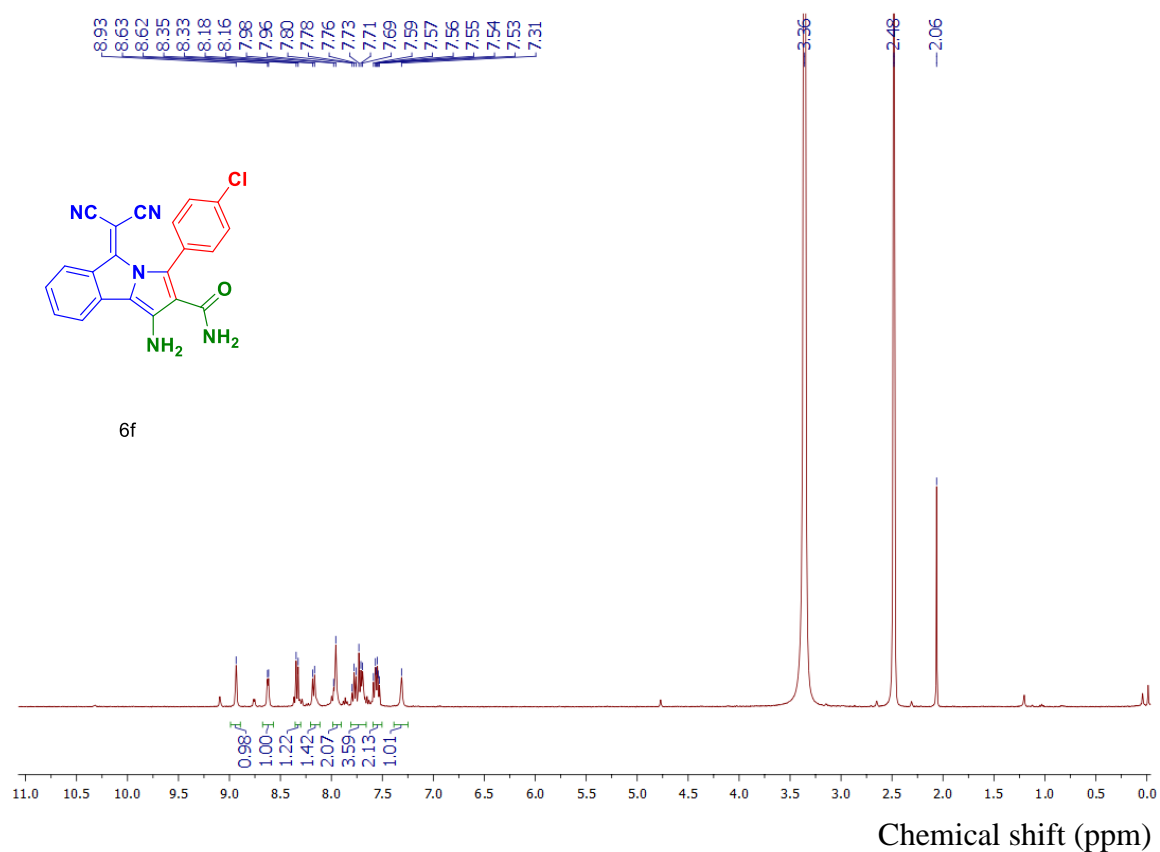

<sup>1</sup>H NMR Spectra of **6g** (400 MHz, DMSO-*d*<sub>6</sub>)

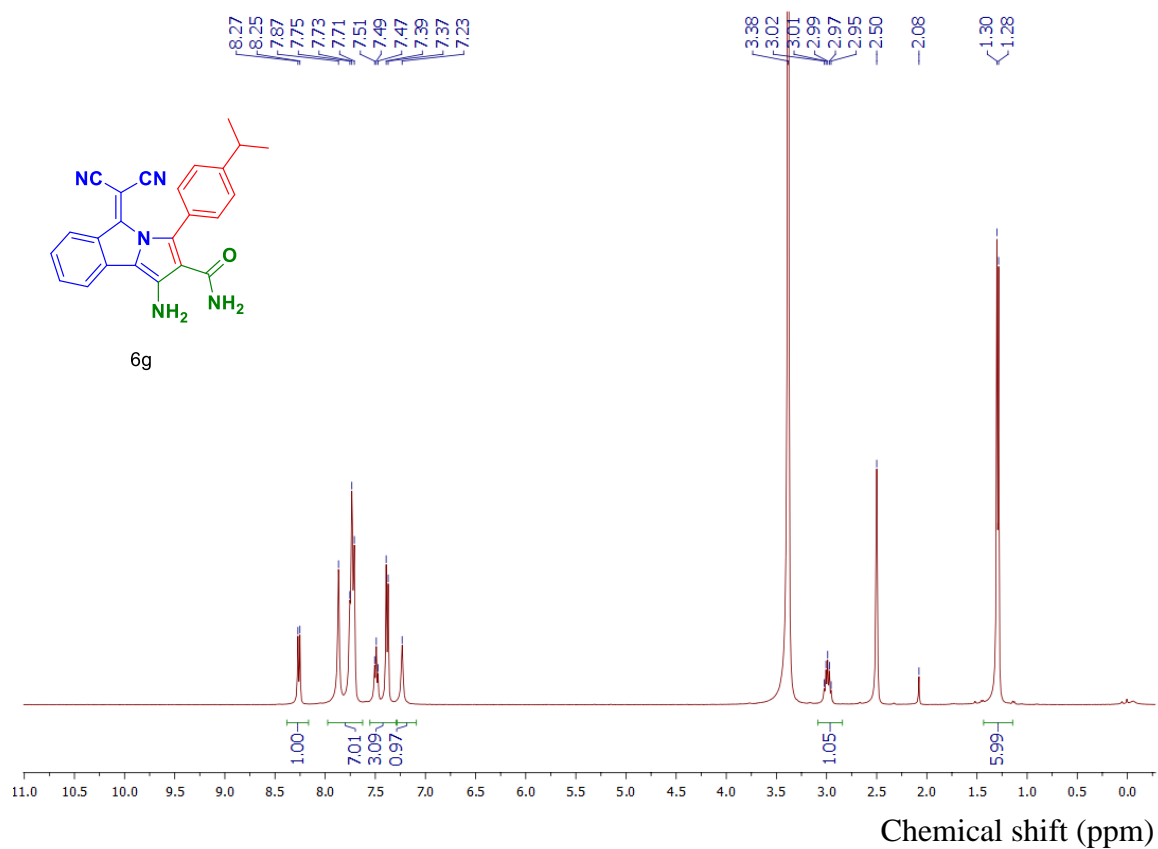

$^1\text{H}$  NMR Spectra of **6h** (400 MHz,  $\text{DMSO-}d_6$ )

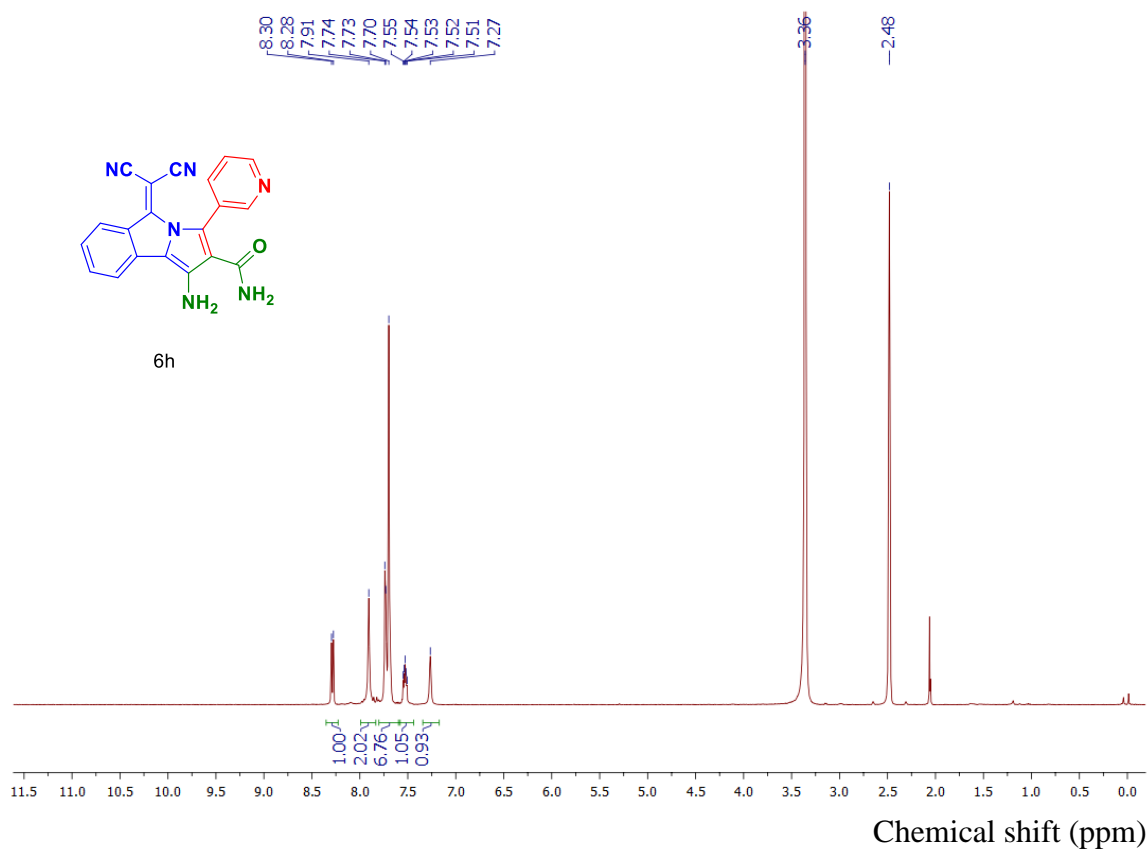

$^1\text{H}$  NMR Spectra of **5e+3** (400 MHz,  $\text{DMSO-}d_6$ )

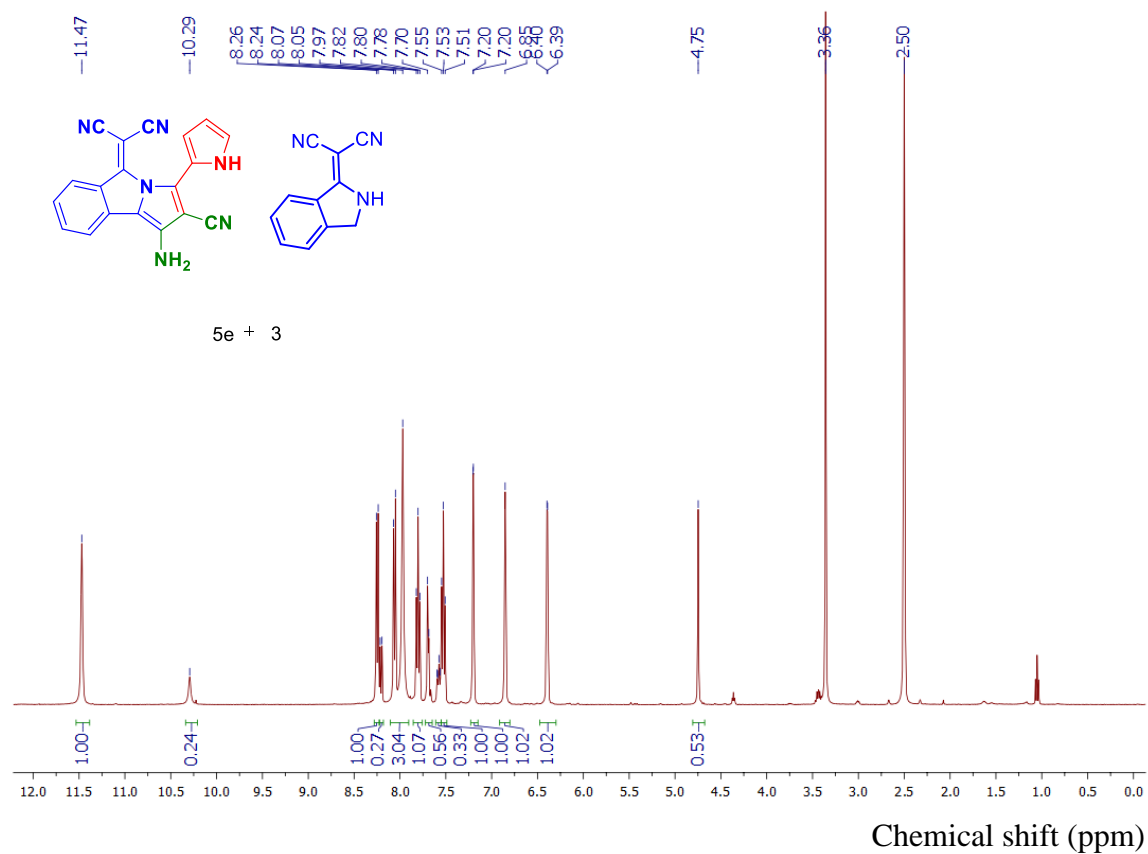

## 7. References

- [1] Sheldrick, G. M. *SHELX-97 - A Program for Crystal Structure Solution and Refinement*; University of Gottingen: Germany, 1997.
- [2] Sheldrick, G. M. *Acta Crystallogr., Sect. A: Found. Crystallogr.* **2008**, *64*, 112–122.
- [3] Farrugia, L. J. ORTEP-3 for Windows - a Version of ORTEPIII with a Graphical User Interface. *J. Appl. Crystallogr.* **1997**, *30*, 565.
